1           **Genome-wide association study of appendicular lean mass in UK Biobank cohort**

2           Yu-Fang Pei<sup>#1,2</sup>, Yao-Zhong Liu<sup>#3</sup>, Xiao-Lin Yang<sup>#2,4</sup>, Hong Zhang<sup>2,4</sup>, Gui-Juan Feng<sup>1,2</sup>, Lei Zhang<sup>2,4</sup>

3           <sup>1</sup>Department of Epidemiology and Health Statistics,

4           <sup>2</sup>Jiangsu Key Laboratory of Preventive and Translational Medicine for Geriatric Diseases, School of Public Health,  
5           Medical College of Soochow University, Jiangsu, PR China.

6           <sup>3</sup>Department of Biostatistics and Data Science, Tulane University School of Public Health and Tropical Medicine,  
7           New Orleans, LA, USA.

8           <sup>4</sup>Center for Genetic Epidemiology and Genomics, School of Public Health, Medical College of Soochow University,  
9           Jiangsu, PR China.

10          **Keywords:** appendicular lean mass, GWAS, UK Biobank

11          **Running title:** GWAS of appendicular lean mass

12          #: These authors contributed equally to this work.

13          Corresponding author:

14          Lei Zhang, Ph.D.

15          Associate Professor

16          Center for Genetic Epidemiology and Genomics

17          School of Public Health, Medical College, Soochow University

18          199 Ren-ai Rd., SuZhou City, Jiangsu Province 215123, PR China

19          Tel: (86)0512-65883871            Email: lzhang6@suda.edu.cn

20

21  
22  
23  
24  
25  
26  
27  
28  
29  
30  
31  
32  
33  
34  
35  
36

## Abstract

Lean body mass (LBM), an important physiological measure, has a strong genetic determination. To clarify its genetic basis, a large-scale genome-wide association study (GWAS) of appendicular lean mass (ALM) was conducted in 450,580 UK Biobank subjects. A total of 717 variants ( $p < 5 \times 10^{-9}$ ) from 561 loci were identified, which were replicated across genders (achieving  $p < 5 \times 10^{-5}$  in both genders). The identified variants explained ~11% phenotypic variance, accounting for one quarter of the total ~40% GWAS-attributable heritability. The identified variants were enriched in gene sets related to musculoskeletal and connective tissue development. Of interest are several genes, including *ADAMTS3*, *PAM*, *SMAD3* and *MEF2C*, that either contain multiple significant variants or serve as the hub genes of the associated gene sets. Polygenic score prediction based on the associated variants was able to distinguish subjects of high from low ALM. Overall, our results offered significant findings on the genetic basis of lean mass through an extraordinarily large sample GWAS. The findings are important to not only lean mass *per se* but also other complex diseases, such as type 2 diabetes and fracture, as our Mendelian randomization analysis showed that ALM is a protective factor for these two diseases.

37

## Introduction

38 Lean body mass (LBM) is an important physiological index. The decline of LBM with aging,  
39 also known as sarcopenia, is a critical factor for functional impairment and physical disability  
40 and a major modifiable cause of frailty in the elderly [1, 2]. LBM is associated with bone mineral  
41 density (BMD), and hence may be also relevant to risk for osteoporosis [3]. Other LBM-related  
42 conditions include dysmobility syndrome [4], sarcopenic obesity [5], and cachexia [6]. Overall,  
43 sarcopenia was responsible for an increased risk of mortality, with a hazard ratio of 1.29 to 2.39  
44 [7].

45 LBM has a significant genetic component, as evidenced by a high heritability of 50% to 80%  
46 as observed in twin studies [8, 9]. However, findings on specific genes for human lean mass  
47 variation remain limited even with the powerful genome-wide association study (GWAS)  
48 approach. A key reason for the limited findings, as in other human complex traits, is the modest  
49 sample size used in most GWAS so far performed in LBM [10-14], resulting in few SNPs (single  
50 nucleotide polymorphisms) identified with genome-wide significance.

51 As a notable example, a recent large meta-analysis of GWAS amassed 20 cohorts of European  
52 ancestry with a total sample size of >38,000 for whole body lean mass (WBM) and of >28,000  
53 for appendicular lean mass (ALM) [15]. However, despite of the large sample used, the percent  
54 variance explained by the identified SNPs was still only 0.23% and 0.16% for WBM and ALM,  
55 respectively, suggesting that most of the heritability of LBM was still undetected. Therefore,  
56 even with such a large GWAS meta-analysis, it is still necessary to boost the sample size further  
57 so as to enhance the statistical power for detecting more causal SNPs underlying LBM.

58 Here in this study, with a sample containing ~half-million subjects of European origin from  
59 UK Biobank (UKB), we performed a GWAS of appendicular lean mass (ALM). At the stringent

60 genome-wide significance level ( $p < 5 \times 10^{-9}$ ), we identified >700 variants that were replicated  
61 across genders. Our findings revealed a large number of genetic variants for LBM and  
62 contributed to the characterization of the genetic architecture of this important complex trait.  
63 Through this GWAS we demonstrated the power for mapping the genetic landscape of common  
64 human complex traits/diseases using extraordinarily large samples.  
65

66

## Results

67 Basic characteristics of the studied UKB sample are listed in **Supplementary Table 1**. In this  
68 study, we quantified appendicular lean mass (ALM) by appendicular fat-free mass measured by  
69 electronic impedance. This measurement of lean mass is reliable based on its strong correlation  
70 with ALM measured by DXA in 4,294 UKB subjects (with a Pearson's correlation coefficient of  
71 0.96,  $p < 2.2 \times 10^{-16}$ ).

### 72 *Main association results*

73 Raw ALM was adjusted with appendicular fat mass (AFM) and the adjusted ALM ( $ALM_{adj}$ )  
74 was the phenotype used for the GWAS. Following quality control (QC) of both  $ALM_{adj}$  and  
75 genome-wide genotypes, data from 19.4 million variants with minor allele frequency  
76 (MAF)  $> 0.1\%$  and imputation quality score  $> 0.3$  were available in 244,945 female and 205,635  
77 male subjects.

78 In each gender group, additive effect of each variant was tested on  $ALM_{adj}$  with BOLT-LMM  
79 [16], controlling for age, age<sup>2</sup>, height and height<sup>2</sup>. The genomic inflation factor showed notable  
80 inflation in both gender groups ( $\lambda_{female} = 1.92$ ,  $\lambda_{male} = 1.77$ ). To examine observed inflation for  
81 potential polygenic effects and other biases, linkage disequilibrium score regression (LDSC)  
82 analysis was performed [17]. The estimated mean chi-square and intercept were 2.34 and 1.12  
83 for females, and 2.53 and 1.15 for males, corresponding to an attenuation ratio (AR) of 0.098 and  
84 0.090, respectively. The AR estimates are comparable to those estimated in the subset of 369,968  
85 unrelated British white subjects (0.090 and 0.074 for females and males, respectively), who were  
86 extracted from the total sample.

87 Using BOLT-REML [18], GWAS-attributable heritability was estimated, which was 0.381  
88 (s.e  $3.30 \times 10^{-3}$ ) and 0.394 (s.e  $3.80 \times 10^{-3}$ ) in females and males, respectively. LDSC estimated a

89 genetic correlation coefficient as high as 0.90 (s.e 0.01) between the two genders, implying that  
90 most GWAS-attributable heritability was shared across genders.

91 Given the shared heritability across genders, across-gender meta-analysis was performed with  
92 the inverse variance weighted fixed-effects model to combine the gender-specific GWAS results.  
93 The meta-analysis signals have an AR of 0.115 (mean chi-square=3.69, intercept=1.31).  
94 Genome-wide significance (GWS) level was set to  $\alpha=5\times 10^{-9}$ , and a suggestive significance level  
95 was set to  $\alpha=5\times 10^{-5}$ . An association was declared to be "replicated" if it is 1) significant at the  
96 GWS level in the across-gender meta-analysis and 2) significant at the suggestive level within  
97 each gender.

98 Based on the above criteria, a total of 589 loci were identified at GWS level in across-gender  
99 meta-analysis ( $p < 5\times 10^{-9}$ ), which were also replicated ( $p < 5\times 10^{-5}$ ) across genders. To check  
100 potential linkage disequilibrium (LD) among these loci, LD analysis was performed on 589 lead  
101 variants (each from one of the loci). It was found that 47 lead variants are not in linkage  
102 equilibrium with each other (LD  $r^2 > 0.1$ ) due to long-range LD. After removing 28 loci, the lead  
103 variants in the remaining 561 loci were all in linkage equilibrium (LD  $r^2 < 0.1$ ). Therefore, these  
104 561 loci were treated as independent loci for downstream analysis.

105 Approximate conditional association analysis and across-gender meta-analysis were  
106 recursively performed, which further identified an additional set of 156 conditionally significant  
107 variants ( $p < 5\times 10^{-9}$  in across gender meta-analysis) that were replicated across genders ( $p < 5\times 10^{-5}$   
108 within each gender). These additional variants were also in linkage equilibrium (LD  $r^2 < 0.1$ ) with  
109 the lead variants of the 561 loci.

110 In total, 717 (i.e., 561+156) independent variants from 561 distinct loci were associated with  
111  $ALM_{adj}$  (**Supplementary Table 2**). Among the 717 lead variants, 172 achieved the strongest

112 significance level ( $p < 5 \times 10^{-9}$ ) in both genders (categorized here as the Tier 1 variants). Also, 144  
113 variants achieved p values  $< 5 \times 10^{-9}$  in females, and p values  $< 5 \times 10^{-5}$  in males; 62 variants  
114 achieved p values  $< 5 \times 10^{-9}$  in males, and p values  $< 5 \times 10^{-5}$  in females (categorized here as the  
115 Tier 2 variants). At last, 339 variants achieved p values  $< 5 \times 10^{-5}$  in both genders and p values  $<$   
116  $5 \times 10^{-9}$  in across-gender meta-analysis (categorized here as the Tier 3 variants).

117 Of the above identified loci, 17 were reported by GWAS or meta-analysis of DXA-derived  
118 lean mass [13, 15, 19]; 104 were reported by a study of electronic impedance measured lean  
119 mass in a subset UKB cohort subjects (N=155,961) [20].

120 We also evaluated the overlap of the identified loci with those identified for several obesity  
121 traits, including body mass index (BMI), waist circumference (WC), WC adjusted for BMI  
122 ( $WC_{adj}BMI$ ), waist-hip ratio (WHR) and WHR adjusted for BMI ( $WHR_{adj}BMI$ ). SNPs in 302  
123 loci (defined as the lead SNP + 500 kb flanking at each side) showed association with one or  
124 more obesity traits at the conventional significance level  $5.0 \times 10^{-8}$ , while no trait was associated  
125 with the remaining 259 loci, demonstrating their novelty and possibly, specificity to lean, but not  
126 fat mass.

### 127 *Gender heterogeneity/specificity*

128 In addition to the 561 loci that are replicated across genders, our analysis also identified 152  
129 loci that are significant ( $p < 5 \times 10^{-9}$ ) in across-gender meta-analysis but not significant at the  
130 suggestive level ( $p < 5 \times 10^{-5}$ ) in either gender group (**Supplementary Table 3**). These loci may  
131 represent gender specific signals pending further replication.

132 Of the 717 identified variants (of the 561 loci), 109 (15.2%) have a high level across-gender  
133 meta-analysis heterogeneity ( $I^2 > 50\%$ ), all (except one) of which belong to Tiers 1 or 2 variants.  
134 A statistical test on gender difference in allele effect size showed that the difference is significant

135 in only 2 SNPs, rs2972156 ( $p_{\text{diff}}=2.49\times 10^{-12}$ ) and rs1933801 ( $p_{\text{diff}}=4.65\times 10^{-6}$ ), after accounting  
136 for multiple testing ( $\alpha=0.05/717=6.97\times 10^{-5}$ ), suggesting that almost all of the identified variants  
137 may have similar effect sizes across genders. The two SNPs (rs2972156 and rs1933801) with  
138 different effect size between genders achieved p values of  $1.30\times 10^{-46}$  and  $2.40\times 10^{-26}$ ,  
139 respectively, in males and p values of  $4.20\times 10^{-7}$  and  $1.30\times 10^{-6}$ , respectively, in females.

#### 140 *Heritability distribution*

141 The 717 identified variants include 654 common variants (MAF>5%), 52 less common  
142 variants ( $5\%\geq\text{MAF}>1\%$ ) and 11 rare variants (MAF $\leq 1\%$ ). Collectively, these variants explain  
143 10.82% phenotypic variance in the total sample, most of which (9.91%) is accounted for by  
144 common variants. As expected, variants with a smaller MAF generally have a larger per allele  
145 effect size (**Figure 1**). For example, the average per allele effect size in rare variants (mean 0.11,  
146 s.d 0.05) is 6-fold larger than common variants (mean 0.02, s.d 0.007).

147 Applying the stratified LDSC analysis, the explained heritability was partitioned into 24  
148 functional categories [21]. Statistically significant enrichments were observed for 19 functional  
149 categories ( $p<0.05/24$ , **Figure 2**). In line with the observations by Finucane et al. [21], regions  
150 conserved in mammals showed the strongest enrichment of any category, with 2.6% of SNPs  
151 explaining an estimated 34.5% of SNP heritability (enrichment ratio (EA)=13.2,  $P=3.39\times 10^{-19}$ ).  
152 Other categories with significant enrichment included coding regions (EA=8.8,  $P=1.76\times 10^{-7}$ ), 3'  
153 UTR (EA=5.7,  $P=3.73\times 10^{-4}$ ), transcription starting site (EA=5.1,  $P=1.71\times 10^{-5}$ ), and H3K9ac  
154 histone marks (EA=5.1,  $P=2.07\times 10^{-15}$ ). Neither promoter nor 5'-UTR region showed significant  
155 enrichment, though 5'-UTR region had a high estimate of EA (15.5,  $p=0.03$ ).

156 A new function of the stratified LDSC method was used to assess focal tissues for heritability  
157 enrichment [22], using two gene expression datasets [23, 24]. A total of 19 tissues/cells are



158 enriched at a false discovery rate (FDR) <5% (**Figure 2**). About half (9) of them belong to  
159 musculoskeletal and connective system, including cartilage, chondrocytes, osteoblasts,  
160 fibroblasts, smooth muscle, myometrium, cervical vertebrae, synovial membrane and stromal  
161 cells.

### 162 *Candidate genes prioritization*

163 To prioritize candidate genes at the associated loci, we used multiple analytical strategies. A  
164 set of credible risk variants (CRVs) at each locus were defined as variants with high LD with the  
165 lead variant ( $r^2 > 0.8$ ). A total of 17,968 CRVs were defined (**Supplementary Table 4**). Based on  
166 the CRVs, 6 types of supporting evidence were used to prioritize 1,337 candidate genes.  
167 (**Supplementary Tables 5-10**).

168 A number of genes have multiple lines of supporting evidence. Peptidylglycine  
169 Alpha-Amidating Monooxygenase (*PAM*) at 5q21.1, in particular, has all lines of supporting  
170 evidence. This locus contains two independent signals. The first is a mis-sense rare SNP  
171 rs78408340 (MAF=0.01%,  $p=6.10 \times 10^{-10}$ ) inside *PAM*, and the second is a common SNP  
172 rs400596 located between *PAM* (129.5 kb from *PAM*) and *SLC06A1* genes (237.2 kb from  
173 *SLC06A1*). Polymorphisms at rs400596 are associated with the *PAM* expression level in whole  
174 blood ( $p=2.51 \times 10^{-21}$ ) [23] and associated with its protein level in peripheral blood ( $p=$   
175  $p=2.51 \times 10^{-30}$ ) [25]. *PAM* is also prioritized by both SMR [26] and DEPICT [27], strengthening  
176 its functional relevance.

### 177 *Comparison between imputation and sequencing-based association signal*

178 Of the 717 identified variants, 42 are mis-sense coding ones. Forty of them, including 7 rare  
179 ones, are available in the recently released UKB exome sequencing data that contain a subset of  
180 ~50,000 subjects from the whole UKB cohort. Using a set of 45,554 unrelated European subjects

181 who were both genotyped/imputed and sequenced, we compared the imputation-based  
182 association results with exome sequencing based results. The 7 rare variants appeared to have  
183 limited imputed dosage variation hence their imputation association p-values were not able to  
184 derive. In the sequencing data, 3 of these 7 variants were nominally significant ( $p < 0.05$ ,  
185 **Supplementary Table 11**), suggesting limited power in imputation-based association analysis  
186 (compared with sequence-based analysis) for rare variants. This limited power may be alleviated  
187 by increased sample size since in the whole UKB cohort these 7 rare variants achieved  
188 significant p values in imputation-based association analysis.

189 Of the remaining 33 variants, the imputation-based and sequencing-based p-values were  
190 highly concordant. For example, the imputation-based p-values are within 2-fold difference of  
191 the sequencing-based p-values for up to 29 variants. Overall, these observations support that  
192 imputation-based association signals are close to the real sequencing-based association signals in  
193 a large sample. Therefore, imputation based GWAS may be able to identify true associations,  
194 even for those of rare variants.

### 195 *Mis-sense variants and the associated genes*

196 As mentioned above, of the 717 identified variants, 42 are mis-sense coding ones. Majority of  
197 these 42 mis-sense mutations are predicted to be deleterious according to more than one  
198 bioinformatics tool including PolyPhen2 [28], SIFT [29], PROVEAN [30] and Fathmm [31]  
199 (**Supplementary Table 12**), supporting their functional relevance.

200 Mis-sense mutations are enriched among rare variants. Eight of the 11 rare variants are  
201 mis-sense mutations, which is in clear contrast to 34 mis-sense mutations among the remaining  
202 706 variants (odds ratio (OR)=55.37, Fisher's exact test  $p = 7.11 \times 10^{-9}$ ). Evidence of the  
203 enrichment became stronger by comparing 21 mis-sense mutations from 63 rare or less common

204 variants vs. 22 mis-sense mutations from 654 common variants (OR=14.36, Fisher's exact test  
205  $p=5.75\times 10^{-13}$ ), suggesting that low frequency mutations are more likely to play a direct role in  
206 changing protein function.

207 Genes containing mis-sense variants are listed in **Table 1**. In particular, the *ADAMTS3* gene  
208 contains 3 rare or less common mis-sense variants (rs141374503 MAF=0.4%  $p=2.02\times 10^{-27}$ ;  
209 rs150270324 MAF=1.3%,  $p=2.36\times 10^{-14}$ , and rs139921635 MAF=2.4%,  $p=4.06\times 10^{-15}$ ). In  
210 addition, it also contains multiple non-mis-sense variants, including 3 conditionally significant  
211 variants in its intron region: rs72653979 (MAF=7.8%,  $p=9.51\times 10^{-11}$ ), rs78862524 (MAF=5.5%,  
212  $p=3.24\times 10^{-23}$ ) and rs769821342 (MAF=3.2%,  $p=1.27\times 10^{-14}$ ), and 2 in its flanking inter-genic  
213 region: chr4:73496010 (MAF=47%,  $p=3.87\times 10^{-21}$ ) and rs10518106 (MAF=6%,  $p=1.16\times 10^{-83}$ ).  
214 Though these SNPs are 367.0 kb apart at most, they are in linkage equilibrium with each other  
215 (LD  $r^2<0.1$ ). Together, the 8 variants from the *ADAMTS3* gene explain 0.18% of phenotypic  
216 variance, making this region the most contributive locus.

### 217 *Gene-based and gene set enrichment analyses*

218 A total of 3,101 genes were significant at the gene-based genome-wide significance level  
219 ( $\alpha=0.05/19,098=2.62\times 10^{-6}$ , **Supplementary Table 13**), and 85 gene sets were significant at the  
220 gene set significance level ( $\alpha=0.05/10,655=4.69\times 10^{-6}$ , **Supplementary Table 14**).

221 The most significant gene set is GO:0001501 'skeletal system development' ( $p=8.88\times 10^{-24}$ ),  
222 followed by GO:0031012 'proteinaceous extracellular matrix' ( $p=5.01\times 10^{-14}$ ), GO:0061448  
223 'connective tissue development' ( $p=1.10\times 10^{-13}$ ), GO:0048705 'skeletal system morphogenesis'  
224 ( $p=9.33\times 10^{-13}$ ) and GO:0031012 'extracellular matrix' ( $p=1.05\times 10^{-12}$ ). Additional gene sets with  
225 known function related to musculoskeletal and connective system, such as GO:0051216:

226 'cartilage development' ( $p=3.30\times 10^{-12}$ ) and GO:0042692 'muscle cell differentiation'  
227 ( $p=1.45\times 10^{-6}$ ), were also identified.

228 Genes involved in multiple gene sets are likely to act as hub genes and may play a central  
229 regulatory role. From the list of significant gene sets, the most frequently involved gene is  
230 *SMAD3* (gene-based association  $p=8.11\times 10^{-42}$ ), which was involved in 46 out of the 85  
231 significant gene sets. It was followed by *SOX9* ( $p=0.05$ , in 44 gene sets), *MEF2C* ( $p=2.83\times 10^{-9}$ ,  
232 in 42 gene sets) and *BMP4* ( $p=0.15$ , in 42 genes). All these 4 genes were reported by previous  
233 studies as important candidate genes for muscle development [32-35]. However, *SOX9* is only  
234 nominally significant and *BMP4* is not significant at single gene level, indicating that the  
235 significant pathway signals may not be contributed by the two genes. Altogether, there are 34  
236 genes, each of which was involved in more than 30 of the 85 significant gene sets.

237 Protein-protein interaction (PPI) analysis using these 34 hub genes connects them into a tight  
238 interactional network (**Figure 3**). This network contains multiple genes that are important for  
239 skeletal muscle development, such as TGF signaling pathway genes (*TGFBI*, *TGFB2* and  
240 *TGFBR2*), BMP signaling pathway genes (*BMP2* and *BMP4*) and SMAD family genes (*SMAD1*,  
241 *SMAD2*, *SMAD3* and *SMAD4*).

#### 242 ***Polygenic risk score profiling***

243 To assess the ability of the GWAS findings to predict ALM, a polygenic scoring analysis was  
244 performed in the subset of 369,968 unrelated British white subjects from the UKB cohort. Three  
245 quarters of the subjects (277,762 participants, including 149,329 females) were randomly  
246 selected as the training sample, with the remaining subjects (92,206 participants, including  
247 49,660 females) as the validation sample.

248 The training sample identifies 72,456 variants that achieved a p-value  $<1 \times 10^{-5}$  for association  
249 with  $ALM_{adj}$ . Using these variants as predictor, the predicted genome-wide polygenic score (GPS)  
250 and the real phenotype residual in the validation sample are significantly correlated (Pearson's  
251 correlation coefficient 0.22, 95% CI (0.21, 0.22),  $p < 2.2 \times 10^{-16}$ ). Mean phenotype residuals in the  
252 top tail are significantly higher than that in the bottom tail of the GPS distribution (**Figure 4**).  
253 For example, the predicted top 1% subjects have an increased average residual of 1.16 than the  
254 predicted bottom 1% participants (0.57 (s.d 0.96) vs. -0.59 (s.d 0.94)), corresponding to an 1.69  
255 kilo-gram (kg) increase of raw ALM (24.61 kg (s.d 5.89 kg) vs. 22.92 kg (s.d 5.27 kg)). In the  
256 female group, the predicted top 1% participants have on average 1.39 kg increase of raw ALM  
257 than the predicted bottom 1% participants (20.26 kg (s.d 2.75 kg) vs. 18.87 kg (s.d 2.45 kg)). In  
258 males, the increase is 2.29 kg (29.82 kg (s.d 4.18 kg) vs. 27.53 kg (s.d 3.56 kg)). These results  
259 demonstrate that the GPS prediction based on the current GWAS finding is capable of  
260 identifying subjects of high or low levels of ALM.

### 261 *Genetic correlations with other traits*

262 To test whether lean mass has a shared genetic etiology with other diseases and relevant traits,  
263 a genetic correlation analysis was performed with the LDSC method [17]. Here, ALM studied in  
264 our study is strongly genetically correlated with DXA-derived whole body lean mass and the  
265 ALM, which were studied by a previous GWAS meta-analysis [15] ( $r_g=0.87$  and  $0.78$ ) (**Figure**  
266 **5**). Furthermore, ALM is modestly correlated with BMI ( $r_g=0.31$ ). However, the correlation with  
267 BMD is low ( $r_g=0.05$ ). ALM is most negatively correlated with BMI adjusted leptin ( $r_g=-0.41$ ). It  
268 is also negatively correlated with body fat ( $r_g=-0.17$ ), suggesting a reverse developmental  
269 direction towards lean and fat mass.

### 270 *Mendelian randomization analysis*

271 To investigate whether ALM is causally linked with other complex diseases, a Mendelian  
272 randomization analysis was performed with GSMR [26]. Ten diseases from a variety of  
273 categories were chose for evaluation, including fracture [36], type 2 diabetes (T2D) [37], asthma  
274 [38], insomnia [39], inflammatory bowel disease (IBD) [40], smoking addiction [41], coronary  
275 artery disease (CAD) [42], amyotrophic lateral sclerosis (ALS) [43], bipolar disorder [44] and  
276 autistic spectrum disorder (ASD) [45]. At the corrected significance level  $5 \times 10^{-3}$  (0.05/10), ALM  
277 is causally associated with type 2 diabetes (T2D,  $p=4.38 \times 10^{-8}$ ) and fracture ( $p=1.18 \times 10^{-3}$ ), but  
278 not with any other disease (**Supplementary Table 15**). Specifically, a negative association is  
279 observed between ALM and both diseases, indicating that ALM is a protective factor for both  
280 diseases. For T2D, an increase in the unit of one s.d of ALM residual corresponds to a decreased  
281 OR of 0.91 (95% CI [0.88, 0.94]). For fracture, an increase in the unit of one s.d. of ALM  
282 residual corresponds to a decreased OR of 0.95 (95% CI [0.92, 0.98]).  
283

284

## Discussion

285 The incapacity in GWAS to detect and replicate specific genetic variants for human complex  
286 traits, contradicting to a trait's established high heritability, e.g., height, was formally recognized  
287 as the “missing heritability” problem a decade ago [46, 47]. An explanation is the so called  
288 “polygenic model”, where hundreds or even thousands of common SNP variants act additively,  
289 with each contributing only a “tiny” fraction of the trait variation. The effect of each individual  
290 variant is so small that a GWAS with a limited sample size ( $n < 20,000$ ) may be extremely  
291 difficult, if not impossible, to detect (let alone replicate) a variant at the genome-wide  
292 significance threshold.

293 The polygenic model was supported by the genome-wide complex trait analysis (GCTA),  
294 where trait similarity among unrelated subjects was correlated with and explained to a large  
295 fraction by similarity of common SNPs at genome-wide scale [48]. Furthermore, with sample  
296 sizes at the scale of hundreds of thousands, two GWAS indeed identified at genome-wide  
297 significance ~700 variants for adult height [49] and >100 loci for schizophrenia [50]. The  
298 successful stories offer a promising prospect for a GWAS with an extraordinarily large sample  
299 size to ultimately unravel the puzzling genetic architecture for human complex traits and  
300 common diseases.

301 In this study of lean mass with around half million subjects, the largest sample used for  
302 GWAS of lean mass so far, a successful endeavor was accomplished again. More than 700  
303 variants were identified at the significance of genome-wide scale ( $p < 5 \times 10^{-9}$ ). In particular, more  
304 than half of these variants achieved genome-wide significance ( $p < 5 \times 10^{-9}$ ) in one gender and  
305 were replicated also in another gender ( $p < 5 \times 10^{-5}$ ). Overall, these >700 variants contributed ~11%

306 of ALM variation, again, the largest explainable fraction of variation for lean mass reported so  
307 far in a GWAS.

308 Our findings of >700 variants are expected for a complex trait with a high heritability,  
309 particularly considering another trait with comparable heritability, height, which detected also  
310 ~700 variants [49]. Interestingly, the majority loci in previous smaller GWAS [13] or  
311 meta-analysis [15] of lean mass are also significant in the present study, providing replication  
312 evidence from independent samples.

313 The functional relevance of our identified variants is supported by the gene set enrichment  
314 analysis, where GO terms, including GO:0001501 'skeletal system development', GO:0061448  
315 'connective tissue development', GO:0051216 'cartilage development' and GO:0042692 'muscle  
316 cell differentiation', are among the top gene sets of significance. Specifically, the “hub genes”  
317 involved in these terms are tightly connected into a network that contains TGF pathway genes,  
318 BMP pathway genes and SMAD family genes, which are all important musculoskeletal  
319 development genes/pathways. This finding is concordant with developmental biology since cells  
320 from bone, cartilage, muscle and fat share the same progenitor, the mesenchymal stem cells, and  
321 pleiotropy of muscle and bone is well recognized in both humans [51] and animal models [52].

322 Among the variants identified, those of several genes, such as *SMAD3*, *MEF2C*, *ADAMTS3*  
323 and *PAM*, are interesting and may need further investigation. The first two genes are the hub  
324 genes involved in half of the significant enriched gene sets. The third gene, *ADAMTS3*, contains  
325 8 variants, including 3 rare or less common mis-sense mutations, which in total explains ~0.2%  
326 of ALM variation. The fourth gene, *PAM*, has multiple lines of supporting evidence for its  
327 regulatory roles, e.g., containing a mis-sense rare SNP rs78408340 (MAF=0.01%,  $p=6.10 \times 10^{-10}$ ).  
328 An intergenic variant, rs400596, is associated with the PAM expression level in whole blood



329 ( $p=2.51\times 10^{-21}$ ) [23] and associated with its protein level in peripheral blood tissue ( $p=$   
330  $p=2.51\times 10^{-30}$ ) [25]. These genes may represent the next candidates for functional and  
331 mechanistic analysis of lean mass regulation.

332 In summary, we performed a GWAS using ~half-million subjects for lean mass. Owing to its  
333 high statistical power, our study identified a large number of variants mapped to GO terms with  
334 functional relevance to musculoskeletal development. The explained variation of ~11% of lean  
335 mass by the identified variants represents a significant leap in revealing the “hidden” heritability  
336 of this complex trait using GWAS. Our findings’ translational value is marked by lean mass’  
337 importance to other complex diseases, such as type 2 diabetes and fracture, as our Mendelian  
338 randomization analysis showed that ALM is a protective factor for these two diseases. Overall,  
339 our study provides another example, where GWAS of substantially increased sample size may  
340 lead a way to ultimately and thoroughly delineate genetic architecture of human complex traits.  
341 This epitomizes the value of big data in genetic research of humans.

342

343

## Materials and Methods

### 344 *Study participants*

345 Study sample came from the UK Biobank (UKB) cohort, which is a large prospective cohort  
346 study of ~500,000 participants from across the United Kingdom, aged between 40-69 at  
347 recruitment. Ethics approval for the UKB study was obtained from the North West Centre for  
348 Research Ethics Committee (11/NW/0382), and informed consent was obtained from all  
349 participants. This study (UKB project #41542) was covered by the general ethical approval for  
350 the UKB study.

351 All the included subjects are those who self-reported as white (data field 21000). Subjects  
352 who had a self-reported gender inconsistent with the genetic gender, who were genotyped but not  
353 imputed or who withdraw their consents were removed. The final sample consisted of 450,580  
354 subjects, including 244,945 females and 205,635 males.

### 355 *Phenotype and modeling*

356 Body composition was measured by bioelectrical impedance approach. Appendicular lean  
357 mass (ALM) was quantified by the sum of fat-free mass at arms (data fields 23121 and 23125)  
358 and at legs (data fields 23113 and 23117). Appendicular fat mass (AFM) was quantified by the  
359 sum of fat mass at arms (data fields 23120 and 23124) and at legs (data fields 23112 and 23116).  
360 In each gender, covariates including AFM, age, age<sup>2</sup>, height and height<sup>2</sup> were tested for  
361 significance in association with ALM using a step-wise linear regression model implemented in  
362 the R function stepAIC. Raw ALM values were adjusted by the significant covariates, and the  
363 residuals were normalized into inverse quantiles of standard normal distribution, which were  
364 used for subsequent association analysis.

365 A small subset of 4,294 subjects also received a dual-energy X-ray absorptiometry (DXA)  
366 body composition scan, and hence their DXA-derived ALM is also available. Therefore, raw  
367 ALM derived from DXA and from electric impedance was compared in these subjects by  
368 Pearson's correlation coefficient.

### 369 *Genotype quality control*

370 Genome-wide genotypes for all subjects were available at 784,256 genotyped autosome  
371 markers, and were imputed into UK10K haplotype, 1000 Genomes project phase 3 and  
372 Haplotype Reference Consortium (HRC) reference panels. A total of ~92 million variants were  
373 generated by imputation. We excluded variants with MAF<0.1% and with imputation  $r^2$ <0.3. As  
374 a result, ~19.4 million well imputed variants were retained for subsequent genetic association  
375 analysis.

### 376 *Genetic association analysis*

377 In each gender group, we used BOLT-LMM to perform linear mixed model (LMM) analysis  
378 [16]. As the LMM analysis can adjust for population structure and relatedness, we included all  
379 eligible subjects into analysis, as recommended by BOLT [53]. We did not include principal  
380 components (PCs) of ancestry as covariates in the LMM analysis.

381 After sex-specific associations were analyzed, we meta-analyzed the summary statistics of the  
382 two genders by inverse-variance weighted fixed-effects model with METAL [54]. The  
383 genome-wide significance (GWS) level was set at  $\alpha=5\times 10^{-9}$ , to account for both common and  
384 rare variants. The variants that passed this threshold in across-gender meta-analysis were then  
385 checked for replicability across genders based on a suggestive significance level  $5\times 10^{-5}$  in each  
386 gender. The suggestive level was set so as to account for multiple testing of presumed maximal  
387 number of 1000 independent loci (0.05/1000). An association was defined as "replicated" if the

388 signal was significant at the GWS level ( $p < 5 \times 10^{-9}$ ) in the meta-analysis and was significant at  
389 the suggestive level ( $p < 5 \times 10^{-5}$ ) in both genders.

390 This declaration of a replicated association was approximately same as a two-stage design,  
391 where the first stage involves selecting variants at the suggestive level ( $p < 5 \times 10^{-5}$ ) in one gender  
392 and the second stage involves replicating the selected variants at the same significance level  
393 ( $p < 5 \times 10^{-5}$ ) in another gender. An association locus was defined as a genomic region of 500 kb to  
394 both sides of a significant lead signal.

395 Difference in effect size between female and male was examined by a two-tailed p-value from  
396 the z-score in the following equation

$$z = \frac{\beta_{female} - \beta_{male}}{\sqrt{var(\beta_{female}) + var(\beta_{male})}}$$

397 , where  $\beta_{female}$  and  $\beta_{male}$  are regression coefficients for females and males, and  $var(\cdot)$  are their  
398 variances, respectively.

### 399 ***Conditional association analysis***

400 To identify additional signals in regions of association, approximate joint and conditional  
401 association analysis was performed in each region using the GCTA tool [55].

402

403 From the UKB sample, a reference sample of 100,000 unrelated subjects was generated for  
404 estimating LD pattern for subsequent analyses. The unrelated subjects were inferred with KING  
405 software [56], from whom the 100,000 subjects of the reference sample were randomly drawn.  
406 Quality control (QC) procedures applied to the reference sample included Hardy-Weinberg  
407 equilibrium ( $p > 1 \times 10^{-6}$ ) and  $MAF > 0.1\%$ .

408 A recursive conditional association analysis was performed. In each iteration, an approximate  
409 conditional analysis conditioning on the current list of lead variants was performed in each  
410 gender, followed by an across-gender meta-analysis to combine the gender-specific results.  
411 Again, a significant replicated association was defined as achieving both a conditional  
412 meta-analysis GWS signal ( $p < 5 \times 10^{-9}$ ) and a conditional suggestive signal ( $p < 5 \times 10^{-5}$ ) in both  
413 genders. In addition, each such identified variant is required to be independent of all variants in  
414 the lead SNP list ( $LD\ r^2 < 0.1$ ). The variant with the lowest p-value among such identified ones  
415 was added into the list of lead variants. Iterations of the conditional analysis were run until no  
416 significant signal can be identified.

#### 417 *Overlap with loci in previous GWAS of obesity traits*

418 GWAS summary statistics for 5 obesity traits, including body mass index (BMI) [57], waist  
419 circumference (WC), WC adjusted for BMI ( $WC_{adjBMI}$ ), waist-hip ratio (WHR) and WHR  
420 adjusted for BMI ( $WHR_{adjBMI}$ ) [58], were downloaded from the GIANT consortium website.  
421 For each trait, SNPs located within all the 561 identified loci (lead SNP +500 kb flanking region  
422 at each side) were extracted from the GWAS summary statistics. Significance level for the  
423 obesity traits were set at the conventional level of  $5.0 \times 10^{-8}$ .

#### 424 *Exome sequencing association analysis*

425 During the preparation of this manuscript, the UKB released exome-sequencing data on a  
426 selected subset of ~50,000 participants. We compared the exome-sequencing based association  
427 results with that based on genotype imputation. To accomplish this, we generated an unrelated  
428 sample consisting of subjects who were both exome-sequenced and genotype-imputed.

429 As the QC procedure, we removed subjects who were not self-reported as white, whose  
430 self-reported genders were inconsistent with their genetic genders, and who withdrew their

431 consents. The KING software was used to select unrelated subjects based on pairwise kinship  
432 matrix for up to 2<sup>nd</sup> degree relatedness [56]. The final sample consisted of 45,554 participants,  
433 including 24,740 females and 20,814 males.

434 Sequence variant coordinates, which were annotated to the GRCH38 assembly, were  
435 converted back to the GRCH37 assembly with Liftover  
436 (<http://genome.ucsc.edu/cgi-bin/hgLiftOver>). For each subject, variants that were missing in the  
437 sequenced data were set to missing in the imputed data as well. In both datasets, genetic  
438 association with normalized phenotype residuals was analyzed with PLINK2 [59]. The top 10  
439 PCs were included as covariates to account for potential population stratification.

#### 440 *Genetic architecture*

441 BOLT-REML was used to estimate heritability tagged by all the analyzed variants [18]. LD  
442 score regression (LDSC) method was used to estimate the amount of genomic inflation due to  
443 confounding factors such as population stratification and cryptic relatedness [17]. Pre-computed  
444 LD scores from the 1000 Genomes project European subjects were used for estimation. The  
445 relative contribution of confounding factors was measured by attenuation ratio (AR), which is  
446 defined as  $(\text{intercept}-1)/(\text{mean } \chi^2-1)$ , where intercept and mean  $\chi^2$  are estimates of  
447 confounding and the overall association inflation, respectively [17].

448 To compare AR with that estimated on unrelated subjects, a maximal subset of unrelated  
449 subjects from the total sample being analyzed were generated. Specifically, KING was used to  
450 extract a subset of unrelated subjects [56]. The resulting unrelated sample included 369,968  
451 participants (198,989 females and 170,979 males). In each gender, PLINK2 was used to perform  
452 genetic association analysis [59]. To account for genetic confounding, the top 10 PCs inferred  
453 from UKB were used as the additional covariates.

454 To calculate the variance explained by all independent lead variants, individual variant effect  
455 size was estimated with the formula  $2f(1-f)\beta^2$ , where  $f$  is allele frequency and  $\beta$  is regression  
456 coefficient associated with the variant.

#### 457 ***Enrichment analysis***

458 Stratified LDSC was used to partition heritability from GWAS summary statistics into  
459 different functional categories [21]. The analysis was based on the ‘full baseline model’ created  
460 by Finucane et al. [21] from 24 publicly available main annotations that are not specific to any  
461 cell type. Significance level of enrichment was set at  $p < 2.08 \times 10^{-3}$  (0.05/24).

462 The stratified LDSC was used to also assess the enrichment of heritability into specific tissues  
463 and cell types [22]. This method analyzes gene expression data together with GWAS summary  
464 statistics, for which, the two pre-compiled gene expression datasets in LDSC were used. The first  
465 one is the GTEx project v6p [23] and the second one is the Franke lab dataset [24]. The GTEx  
466 dataset contains 53 tissues with an average of 161 samples per tissue. The Franke lab dataset is  
467 an aggregation of publicly available microarray gene expression datasets comprising 37,427  
468 human samples from 152 tissues. The total 205 (=53+152) tissues are classified into nine  
469 categories for visualization. Significance was declared at a false discovery rate (FDR)<5%.

#### 470 ***Candidate gene prioritization***

471 In each associated locus, a set of credible risk variants (CRVs) were defined as those variants  
472 in strong LD with the lead variant ( $r^2 > 0.8$ , including lead variant). LD  $r^2$  measure was estimated  
473 based on the 100,000 unrelated reference sample with LDstore [60]. Six sources of information  
474 was used to evaluate a gene's causality: 1) being nearest to the lead CRV; 2) containing a  
475 mis-sense coding CRV; 3) being a target gene for a cis-eQTL CRV; 4) being a target gene for a

476 cis- protein QTL (cis-pQTL) CRV; 5) being prioritized by DEPICT analysis [27] and 6) being  
477 prioritized by SMR analysis [61].

478 Cis-eQTLs revealed by the GTEx (v7) project were accessed from the GTEx web portal  
479 ([www.gtexportal.org/](http://www.gtexportal.org/)) [23]. Cis-eQTL information is available for over 50 tissues. We selected  
480 skeletal muscle and whole blood for our analysis. Cis-eQTL was searched within 500 kb distance  
481 from a target gene. Significant cis-eQTL was declared at  $p < 5 \times 10^{-5}$ .

482 Cis-pQTL information was accessed from Sun et al. [25]. GWAS summary statistics for 3,284  
483 proteins were downloaded from the study's website. Cis-pQTL was searched within 500 kb  
484 distance from a target gene. Significant cis-eQTL was declared at  $p < 5 \times 10^{-5}$ .

485 DEPICT is an integrative tool that takes advantage of predicted gene functions to  
486 systematically prioritize the most likely causal genes at loci of interest [27]. The input of  
487 DEPICT includes a list of variant identifiers, and the output contains all genes located in the loci  
488 and their p-values of being a candidate gene. All lead variants were submitted to DEPICT for  
489 analysis. Significant genes were declared at a false discovery rate (FDR) < 5%.

490 SMR (Summary data-based Mendelian Randomization) method [61] is another SNP  
491 prioritization program that integrates summary-level data from GWAS with data from eQTL  
492 studies to identify genes whose expression levels are associated with trait due to causal or  
493 pleiotropy effects. Here, the pleiotropy effect means that a SNP is causally associated with both  
494 gene expression and phenotypic variation. SMR uses SNPs as an instrumental variable and tests  
495 the causal relation of gene expression to phenotype variation. The results are interpreted as the  
496 effect of gene expression on phenotype free of confounding from non-genetic factors. We used a  
497 pre-compiled eQTL dataset in whole blood tissue [62] for estimation.

498 *Gene-based and gene set enrichment analyses*



499 Gene-based association analysis was performed with MAGMA v1.6 [63], as implemented on  
500 the FUMA website (<http://fuma.ctglab.nl/>). GWAS meta-analysis summary statistics were  
501 mapped to 19,427 protein-coding genes, resulting in 19,098 genes that were covered by at least  
502 one SNP. Gene-based association test was performed taking into account the LD between  
503 variants. Gene-based significance level was set at stringent Bonferroni corrected threshold  
504  $2.62 \times 10^{-6}$ , i.e.,  $0.05/19,098$ .

505 The generated gene-based summary statistics were further used to test for enrichment of  
506 association to specific biological pathways or gene sets. A gene set's association signal was  
507 evaluated by integrating all signals from the genes in the set with MAGMA [63]. A competitive  
508 gene set analysis model was used to test whether the genes in a gene set are more strongly  
509 associated with the phenotype than other genes.

510 Gene sets were obtained through the MSigDB website  
511 (<http://software.broadinstitute.org/gsea/msigdb/index.jsp>) [64]. Each gene was assigned to a gene  
512 set as annotated by gene ontology (GO), Kyoto encyclopedia of genes and genomes (KEGG),  
513 Reactome and BioCarta gene set databases and other gene sets curated by domain experts or  
514 biomedical literature [64]. A total of 10,651 (4,734 curated and 5,917 GO terms) gene sets were  
515 used in this analysis. The significance level was set at a Bonferroni-corrected level of  
516  $0.05/10,651 = 4.69 \times 10^{-6}$ .

517 Protein-protein interaction network was constructed with STRING [65]. STRING uses  
518 information based on gene co-expression, text-mining, and others, to construct protein interactive  
519 network.

520 ***Polygenic risk score profiling***

521 To assess the capability of the GWAS finding to predict ALM, a polygenic scoring analysis  
522 was conducted in the 369,968 unrelated subjects extracted from the main UKB sample. Three  
523 quarters of the individuals (277,762 subjects, including 149,329 females) were randomly selected  
524 as the training sample, and the remaining one quarter individuals (92,206 participants, including  
525 49,660 females) as the validation sample. Female and male subjects were pooled together for  
526 analysis.

527 Raw phenotype was adjusted by age, age<sup>2</sup>, gender, height, height<sup>2</sup> and the top 10 PCs, and the  
528 residuals were converted to the standard normal distribution quantiles for downstream analysis.  
529 Genetic association analysis was performed with PLINK2 [59].

530 The same QC procedures as in the main analysis were used to process the variants. The  
531 variants achieving a p-value of  $<1 \times 10^{-5}$  in the training sample were selected and used for  
532 prediction in the validation sample via LDpred approach [66]. LDpred infers the posterior mean  
533 effect size of each marker by using a prior on effect sizes and LD information from an external  
534 reference panel. Specifically, the validation sample with original genotypes was used as  
535 reference panel for LD estimation. The number of SNPs used to adjust LD from each side of the  
536 target SNP was set to 1000. Other software parameters were set to the default.

### 537 *Genetic correlations with other traits*

538 To test whether lean mass has a shared genetic etiology with other diseases and relevant traits,  
539 a genetic correlation analysis was performed with LDSC method [17]. An online web tool,  
540 LDHub (<http://ldsc.broadinstitute.org/ldhub/>), was used to estimate the genetic correlation  
541 between ALM<sub>adj</sub> and 49 complex traits and diseases. The standalone version of the software was  
542 used to estimate between ALM<sub>adj</sub> and two additional traits, ALM and total body lean mass,  
543 measured by the DXA scan, which are not available in the LDHub GWAS summary statistics

544 collections, and which were downloaded from the GEFOS consortium website  
545 (<http://www.gefos.org>).

546 Both the LDHub and standalone analyses adopted same QC criteria. Specifically, only  
547 HapMap3 autosomal SNPs were included to minimize poor imputation quality [17]. SNPs were  
548 further removed given the following conditions:  $MAF < 0.01$ , ambiguous strand (A/T or C/G),  
549 duplicated identifier, or reported sample size less than 60% of total sample size. LD scores  
550 pre-computed on the 1000 genomes project European individuals were used for calculation.

### 551 *Mendelian randomization analysis*

552 To investigate whether ALM (as exposure) is causally associated with complex diseases (as  
553 outcome), a Mendelian randomization analysis with GSMR was performed [26] on selected 10  
554 complex diseases, including fracture [36], type 2 diabetes (T2D) [37], asthma [38], insomnia  
555 [39], inflammatory bowel disease (IBD) [40], smoking addiction [41], coronary artery disease  
556 (CAD) [42], amyotrophic lateral sclerosis (ALS) [43], bipolar disorder [44] and autistic spectrum  
557 disorder (ASD) [45].

558 GWAS summary statistics for these diseases were downloaded from the respective websites.  
559 From the list of SNPs whose association signals with  $ALM_{adj}$  were below  $5 \times 10^{-8}$ , qualified SNPs  
560 were included based on the following criteria: concordant alleles between exposure and outcome  
561 GWAS summary statistics, non-palindromic SNPs with certain strand,  $MAF > 1\%$ , and allele  
562 frequency difference between exposure and outcome GWAS summary statistics  $< 0.2$ .

563 Independent SNPs were further clumped with PLINK2 [59] with independence LD threshold  
564  $r^2 < 0.05$  and 1 MB window size. The clumped independent SNPs were examined for their  
565 pleiotropic effects to both exposure and outcome by the HEIDI test [26]. Significance level for  
566 the HEIDI test was set to  $\alpha = 1 \times 10^{-5}$ . After removing pleiotropic SNPs, the remaining independent

567 SNPs were taken as instrumental variables to test for the causal effect of exposure to outcome.

568 The estimated causal effect coefficients are approximately equal to the natural log odds ratio (OR)

569 for a case–control trait. The MR analysis significance level was set to 0.005 (0.05/10).

570

571

### **Acknowledgements**

572 This research was conducted using the UK Biobank resource under application number 41542.

573 This study was partially supported by the funding from national natural science foundation of

574 China (31571291 to LZ, 31771417 and 31501026 to YFP), the natural science foundation of

575 Jiangsu province of China (BK20150323 to YFP).

576

577

## References

- 578 1. Giles, J.T., et al., *Association of body composition with disability in rheumatoid arthritis:*  
579 *impact of appendicular fat and lean tissue mass.* Arthritis Rheum, 2008. **59**(10): p.  
580 1407-15.
- 581 2. Janssen, I., S.B. Heymsfield, and R. Ross, *Low relative skeletal muscle mass (sarcopenia)*  
582 *in older persons is associated with functional impairment and physical disability.* J Am  
583 Geriatr Soc, 2002. **50**(5): p. 889-96.
- 584 3. Miyakoshi, N., et al., *Prevalence of sarcopenia in Japanese women with osteopenia and*  
585 *osteoporosis.* J Bone Miner Metab, 2013. **31**(5): p. 556-61.
- 586 4. Binkley, N., D. Krueger, and B. Buehring, *What's in a name revisited: should osteoporosis*  
587 *and sarcopenia be considered components of "dysmobility syndrome?".* Osteoporos Int,  
588 2013. **24**(12): p. 2955-9.
- 589 5. Wannamethee, S.G. and J.L. Atkins, *Muscle loss and obesity: the health implications of*  
590 *sarcopenia and sarcopenic obesity.* Proc Nutr Soc, 2015. **74**(4): p. 405-12.
- 591 6. Evans, W.J., et al., *Cachexia: a new definition.* Clin Nutr, 2008. **27**(6): p. 793-9.
- 592 7. Brown, J.C., M.O. Harhay, and M.N. Harhay, *Sarcopenia and mortality among a*  
593 *population-based sample of community-dwelling older adults.* J Cachexia Sarcopenia  
594 Muscle, 2016. **7**(3): p. 290-8.
- 595 8. Arden, N.K. and T.D. Spector, *Genetic influences on muscle strength, lean body mass,*  
596 *and bone mineral density: a twin study.* J Bone Miner Res, 1997. **12**(12): p. 2076-81.
- 597 9. Livshits, G., et al., *Contribution of Heritability and Epigenetic Factors to Skeletal Muscle*  
598 *Mass Variation in United Kingdom Twins.* J Clin Endocrinol Metab, 2016. **101**(6): p.  
599 2450-9.
- 600 10. Liu, X.G., et al., *Genome-wide association and replication studies identified TRHR as an*  
601 *important gene for lean body mass.* Am J Hum Genet, 2009. **84**(3): p. 418-23.
- 602 11. Ran, S., et al., *Gene-based genome-wide association study identified 19p13.3 for lean*  
603 *body mass.* Sci Rep, 2017. **7**: p. 45025.
- 604 12. Hai, R., et al., *Bivariate genome-wide association study suggests that the DARC gene*  
605 *influences lean body mass and age at menarche.* Sci China Life Sci, 2012. **55**(6): p.  
606 516-20.
- 607 13. Urano, T., et al., *Large-scale analysis reveals a functional single-nucleotide*  
608 *polymorphism in the 5'-flanking region of PRDM16 gene associated with lean body mass.*  
609 Aging Cell, 2014. **13**(4): p. 739-43.
- 610 14. Klimentidis, Y.C., et al., *Genetic Variant in ACVR2B Is Associated with Lean Mass.* Med Sci  
611 Sports Exerc, 2016. **48**(7): p. 1270-5.
- 612 15. Zillikens, M.C., et al., *Large meta-analysis of genome-wide association studies identifies*  
613 *five loci for lean body mass.* Nat Commun, 2017. **8**(1): p. 80.
- 614 16. Loh, P.R., et al., *Efficient Bayesian mixed-model analysis increases association power in*  
615 *large cohorts.* Nat Genet, 2015. **47**(3): p. 284-90.
- 616 17. Bulik-Sullivan, B.K., et al., *LD Score regression distinguishes confounding from*  
617 *polygenicity in genome-wide association studies.* Nature Genetics, 2015. **47**(3): p.  
618 291-295.
- 619 18. Loh, P.R., et al., *Contrasting genetic architectures of schizophrenia and other complex*  
620 *diseases using fast variance-components analysis.* Nat Genet, 2015. **47**(12): p. 1385-92.

- 621 19. Medina-Gomez, C., et al., *Bivariate genome-wide association meta-analysis of pediatric*  
622 *musculoskeletal traits reveals pleiotropic effects at the SREBF1/TOM1L2 locus*. Nat  
623 Commun, 2017. **8**(1): p. 121.
- 624 20. Hubel, C., et al., *Genomics of body fat percentage may contribute to sex bias in anorexia*  
625 *nervosa*. Am J Med Genet B Neuropsychiatr Genet, 2018.
- 626 21. Finucane, H.K., et al., *Partitioning heritability by functional annotation using*  
627 *genome-wide association summary statistics*. Nat Genet, 2015. **47**(11): p. 1228-35.
- 628 22. Finucane, H.K., et al., *Heritability enrichment of specifically expressed genes identifies*  
629 *disease-relevant tissues and cell types*. Nat Genet, 2018. **50**(4): p. 621-629.
- 630 23. Consortium, G.T., *Human genomics. The Genotype-Tissue Expression (GTEx) pilot*  
631 *analysis: multitissue gene regulation in humans*. Science, 2015. **348**(6235): p. 648-60.
- 632 24. Fehrmann, R.S., et al., *Gene expression analysis identifies global gene dosage sensitivity*  
633 *in cancer*. Nat Genet, 2015. **47**(2): p. 115-25.
- 634 25. Sun, B.B., et al., *Genomic atlas of the human plasma proteome*. Nature, 2018. **558**(7708):  
635 p. 73-79.
- 636 26. Zhu, Z., et al., *Causal associations between risk factors and common diseases inferred*  
637 *from GWAS summary data*. Nat Commun, 2018. **9**(1): p. 224.
- 638 27. Pers, T.H., et al., *Biological interpretation of genome-wide association studies using*  
639 *predicted gene functions*. Nat Commun, 2015. **6**: p. 5890.
- 640 28. Adzhubei, I.A., et al., *A method and server for predicting damaging missense mutations*.  
641 Nat Methods, 2010. **7**(4): p. 248-9.
- 642 29. Kumar, P., S. Henikoff, and P.C. Ng, *Predicting the effects of coding non-synonymous*  
643 *variants on protein function using the SIFT algorithm*. Nat Protoc, 2009. **4**(7): p. 1073-81.
- 644 30. Choi, Y., et al., *Predicting the functional effect of amino acid substitutions and indels*.  
645 PLoS One, 2012. **7**(10): p. e46688.
- 646 31. Shihab, H.A., et al., *Predicting the functional, molecular, and phenotypic consequences of*  
647 *amino acid substitutions using hidden Markov models*. Hum Mutat, 2013. **34**(1): p.  
648 57-65.
- 649 32. Schmidt, K., et al., *Sox8 is a specific marker for muscle satellite cells and inhibits*  
650 *myogenesis*. J Biol Chem, 2003. **278**(32): p. 29769-75.
- 651 33. Ge, X., et al., *Lack of Smad3 signaling leads to impaired skeletal muscle regeneration*.  
652 Am J Physiol Endocrinol Metab, 2012. **303**(1): p. E90-102.
- 653 34. Estrella, N.L., et al., *MEF2 transcription factors regulate distinct gene programs in*  
654 *mammalian skeletal muscle differentiation*. J Biol Chem, 2015. **290**(2): p. 1256-68.
- 655 35. Frank, N.Y., et al., *Regulation of myogenic progenitor proliferation in human fetal*  
656 *skeletal muscle by BMP4 and its antagonist Gremlin*. J Cell Biol, 2006. **175**(1): p. 99-110.
- 657 36. Trajanoska, K., et al., *Assessment of the genetic and clinical determinants of fracture risk:*  
658 *genome wide association and mendelian randomisation study*. BMJ, 2018. **362**: p. k3225.
- 659 37. Xue, A., et al., *Genome-wide association analyses identify 143 risk variants and putative*  
660 *regulatory mechanisms for type 2 diabetes*. Nat Commun, 2018. **9**(1): p. 2941.
- 661 38. Moffatt, M.F., et al., *A large-scale, consortium-based genomewide association study of*  
662 *asthma*. N Engl J Med, 2010. **363**(13): p. 1211-1221.

- 663 39. Hammerschlag, A.R., et al., *Genome-wide association analysis of insomnia complaints*  
664 *identifies risk genes and genetic overlap with psychiatric and metabolic traits*. Nat Genet,  
665 2017. **49**(11): p. 1584-1592.
- 666 40. Liu, J.Z., et al., *Association analyses identify 38 susceptibility loci for inflammatory bowel*  
667 *disease and highlight shared genetic risk across populations*. Nat Genet, 2015. **47**(9): p.  
668 979-986.
- 669 41. *Genome-wide meta-analyses identify multiple loci associated with smoking behavior*.  
670 Nat Genet, 2010. **42**(5): p. 441-7.
- 671 42. van der Harst, P. and N. Verweij, *Identification of 64 Novel Genetic Loci Provides an*  
672 *Expanded View on the Genetic Architecture of Coronary Artery Disease*. Circ Res, 2018.  
673 **122**(3): p. 433-443.
- 674 43. van Rheenen, W., et al., *Genome-wide association analyses identify new risk variants*  
675 *and the genetic architecture of amyotrophic lateral sclerosis*. Nat Genet, 2016. **48**(9): p.  
676 1043-8.
- 677 44. Stahl, E.A., et al., *Genome-wide association study identifies 30 Loci Associated with*  
678 *Bipolar Disorder*. bioRxiv, 2018: p. 173062.
- 679 45. Grove, J., et al., *Identification of common genetic risk variants for autism spectrum*  
680 *disorder*. Nat Genet, 2019. **51**(3): p. 431-444.
- 681 46. Manolio, T.A., et al., *Finding the missing heritability of complex diseases*. Nature, 2009.  
682 **461**(7265): p. 747-53.
- 683 47. Zuk, O., et al., *The mystery of missing heritability: Genetic interactions create phantom*  
684 *heritability*. Proc Natl Acad Sci U S A, 2012. **109**(4): p. 1193-8.
- 685 48. Yang, J., et al., *Common SNPs explain a large proportion of the heritability for human*  
686 *height*. Nat Genet, 2010. **42**(7): p. 565-9.
- 687 49. Wood, A.R., et al., *Defining the role of common variation in the genomic and biological*  
688 *architecture of adult human height*. Nat Genet, 2014. **46**(11): p. 1173-86.
- 689 50. Consortium, S.W.G.o.t.P.G., *Biological insights from 108 schizophrenia-associated*  
690 *genetic loci*. Nature, 2014. **511**(7510): p. 421-7.
- 691 51. Karasik, D. and D.P. Kiel, *Genetics of the musculoskeletal system: a pleiotropic approach*.  
692 J Bone Miner Res, 2008. **23**(6): p. 788-802.
- 693 52. Blank, R.D., *Bone and Muscle Pleiotropy: The Genetics of Associated Traits*. Clin Rev Bone  
694 Miner Metab, 2014. **12**(2): p. 61-65.
- 695 53. Loh, P.R., et al., *Mixed-model association for biobank-scale datasets*. Nat Genet, 2018.  
696 **50**(7): p. 906-908.
- 697 54. Sanna, S., et al., *Common variants in the GDF5-UQCC region are associated with*  
698 *variation in human height*. Nat Genet, 2008. **40**(2): p. 198-203.
- 699 55. Yang, J., et al., *GCTA: a tool for genome-wide complex trait analysis*. Am J Hum Genet,  
700 2011. **88**(1): p. 76-82.
- 701 56. Manichaikul, A., et al., *Robust relationship inference in genome-wide association studies*.  
702 Bioinformatics, 2010. **26**(22): p. 2867-73.
- 703 57. Yengo, L., et al., *Meta-analysis of genome-wide association studies for height and body*  
704 *mass index in approximately 700000 individuals of European ancestry*. Hum Mol Genet,  
705 2018. **27**(20): p. 3641-3649.



- 706 58. Shungin, D., et al., *New genetic loci link adipose and insulin biology to body fat*  
707 *distribution*. Nature, 2015. **518**(7538): p. 187-196.
- 708 59. Chang, C.C., et al., *Second-generation PLINK: rising to the challenge of larger and richer*  
709 *datasets*. Gigascience, 2015. **4**: p. 7.
- 710 60. Benner, C., et al., *Prospects of Fine-Mapping Trait-Associated Genomic Regions by Using*  
711 *Summary Statistics from Genome-wide Association Studies*. Am J Hum Genet, 2017.  
712 **101**(4): p. 539-551.
- 713 61. Zhu, Z., et al., *Integration of summary data from GWAS and eQTL studies predicts*  
714 *complex trait gene targets*. Nat Genet, 2016. **48**(5): p. 481-7.
- 715 62. Westra, H.J., et al., *Systematic identification of trans eQTLs as putative drivers of known*  
716 *disease associations*. Nat Genet, 2013. **45**(10): p. 1238-1243.
- 717 63. de Leeuw, C.A., et al., *MAGMA: generalized gene-set analysis of GWAS data*. PLoS  
718 Comput Biol, 2015. **11**(4): p. e1004219.
- 719 64. Subramanian, A., et al., *Gene set enrichment analysis: a knowledge-based approach for*  
720 *interpreting genome-wide expression profiles*. Proc Natl Acad Sci U S A, 2005. **102**(43): p.  
721 15545-50.
- 722 65. Szklarczyk, D., et al., *STRING v11: protein-protein association networks with increased*  
723 *coverage, supporting functional discovery in genome-wide experimental datasets*.  
724 Nucleic Acids Res, 2019. **47**(D1): p. D607-D613.
- 725 66. Vilhjalmsson, B.J., et al., *Modeling Linkage Disequilibrium Increases Accuracy of*  
726 *Polygenic Risk Scores*. Am J Hum Genet, 2015. **97**(4): p. 576-92.  
727  
728  
729

730

## Figure Legends

### 731 **Figure 1. Main association results.**

732 **Figure 1A**, Per allele effect size versus minor allele frequency (MAF). X-axis is MAF at the 717  
733 identified variants and y-axis is per allele effect size (regression coefficient). **Figure 1B**, the Manhattan  
734 plot of the meta-analysis combining both genders. The horizontal red line indicates the genome-wide  
735 significance level ( $\alpha = 5 \times 10^{-9}$ ) in  $-\log_{10}$  scale. All novel loci were marked in green.

736

### 737 **Figure 2. Heritability enrichment in different functional annotations and tissues.**

738 **Figure 2A** is enrichment of genome-wide association signals in 24 main annotations using LDSC  
739 regression. Y-axis represents the ratio of phenotypic variance explained by variants in a particular  
740 annotation category against that explained in the remaining regions. Error bars represent jackknife  
741 standard errors around the estimates of enrichment. A single asterisk indicates significance at  $p < 0.05$  after  
742 Bonferroni correction for the 24 hypotheses tested, and two asterisks indicates significance at  $p < 0.01$ .  
743 **Figure 2B** is enrichment of genome-wide association signals in 206 cells/tissues from two different  
744 databases (Franke lab dataset and GTEx consortium dataset). The total cells/tissues were divided into  
745 9 categories. Each dot represents a specific cell/tissue and the tissues passing the cutoff of  $FDR < 5\%$  at  
746  $-\log_{10}(p) = 2.75$  were marked in large.

747

### 748 **Figure 3. Protein-protein interactional network.**

749 Thirty-four genes over-represented in 85 significant pathways were selected to construct a protein-protein  
750 interaction network with STRING, which bases the construction on knowledge of gene co-expression,  
751 text-mining, and others.

752

### 753 **Figure 4. Polygenic score prediction.**

754 A total of 277,762 subjects were randomly selected as the training sample, and another  
755 independent 92,206 subjects were selected as the validation sample. The variants achieving a  
756 p-value of  $<1 \times 10^{-5}$  in the training sample were selected and used for prediction in the validation  
757 sample via LDpred approach. Subjects in the two extreme tails of the predicted genome-wide  
758 polygenic score (GPS) distribution were compared in terms of raw phenotype mean (after  
759 correction). X-axis represents the fraction of subjects drawn from both extreme tails of the predicted  
760 GPS distribution. Y-axis represents mean  $ALM_{adj}$  ( $\pm 95\%$  confidence interval).

761

762 **Figure 5. Genetic overlap with other traits.**

763 Genetic correlations ( $r_g$ ) between  $ALM_{adj}$  and 51 traits and diseases were estimated. LD Score regression  
764 tested genome-wide SNP associations for these participants against similar data for various other traits  
765 and diseases containing Musculoskeletal system, anthropometrics, obesity, cognition, metabolism,  
766 psychiatry, reproduction and neuropsychiatric outcomes. Error bars represent standard errors on these  
767 estimates. Blue bars represent significantly positive correlation at the nominal level  $p < 0.05$ ; pink bars  
768 represent significantly negative correlation ( $p < 0.05$ ); grey bars represent non-significant correlation.

769

Table 1. Association results of 42 mis-sense variants.

| RSID        | CHR | POS       | BAND     | Alleles<br>(REF/ALT) | FRQ   | Gene         | Protein change | Condition | Female (N=244,945) |       | Male (N=205,635)       |       | Meta-analysis (N=450,580) |                        |       |       |                         |                       |      |
|-------------|-----|-----------|----------|----------------------|-------|--------------|----------------|-----------|--------------------|-------|------------------------|-------|---------------------------|------------------------|-------|-------|-------------------------|-----------------------|------|
|             |     |           |          |                      |       |              |                |           | B                  | SE    | B                      | SE    | B                         | SE                     | P     | H2    | I2                      |                       |      |
| Rare        |     |           |          |                      |       |              |                |           |                    |       |                        |       |                           |                        |       |       |                         |                       |      |
| rs148330006 | 1   | 86048526  | 1p22.3   | C/G                  | 0.008 | CYR61        | p.Ser316Cys    | Primary   | 0.14               | 0.015 | 4.70×10 <sup>-22</sup> | 0.1   | 0.016                     | 1.80×10 <sup>-11</sup> | 0.12  | 0.011 | 4.31×10 <sup>-30</sup>  | 2.52×10 <sup>-4</sup> | 60.3 |
| rs200219556 | 2   | 241974013 | 2q37.3   | G/A                  | 0.007 | SNED1        | p.Arg224His    | Secondary | 0.07               | 0.016 | 8.85×10 <sup>-6</sup>  | 0.07  | 0.017                     | 1.13×10 <sup>-7</sup>  | -0.07 | 0.011 | 4.28×10 <sup>-10</sup>  | 7.45×10 <sup>-5</sup> | 0    |
| rs141374503 | 4   | 73179445  | 4q13.3   | C/T                  | 0.004 | ADAMTS3      | p.Arg565Gln    | Secondary | -0.17              | 0.021 | 4.50×10 <sup>-16</sup> | -0.16 | 0.023                     | 6.17×10 <sup>-15</sup> | 0.17  | 0.016 | 2.02×10 <sup>-27</sup>  | 2.26×10 <sup>-7</sup> | 0    |
| rs148833559 | 5   | 172755066 | 5q35.2   | C/A                  | 0.001 | STC2         | p.Arg44Leu     | Primary   | -0.17              | 0.035 | 8.90×10 <sup>-7</sup>  | -0.26 | 0.039                     | 4.50×10 <sup>-12</sup> | 0.21  | 0.026 | 2.34×10 <sup>-16</sup>  | 1.28×10 <sup>-4</sup> | 63.1 |
| rs138940563 | 5   | 79375038  | 5q14.1   | C/T                  | 0.003 | THBS4        | p.Ala823Val    | Primary   | -0.09              | 0.023 | 3.70×10 <sup>-5</sup>  | -0.13 | 0.025                     | 8.80×10 <sup>-7</sup>  | 0.11  | 0.017 | 2.10×10 <sup>-10</sup>  | 7.64×10 <sup>-5</sup> | 36.9 |
| rs78727187  | 5   | 127668685 | 5q23.3   | G/T                  | 0.006 | FBN2         | p.His1381Asn   | Secondary | 0.07               | 0.017 | 2.68×10 <sup>-5</sup>  | 0.12  | 0.019                     | 6.81×10 <sup>-11</sup> | -0.1  | 0.013 | 6.67×10 <sup>-14</sup>  | 1.14×10 <sup>-4</sup> | 75.2 |
| rs78408340  | 5   | 102338739 | 5q21.1   | C/G                  | 0.009 | PAM          | p.Ser539Tyr    | Secondary | 0.06               | 0.014 | 5.45×10 <sup>-6</sup>  | 0.06  | 0.015                     | 2.70×10 <sup>-7</sup>  | 0.06  | 0.01  | 6.10×10 <sup>-10</sup>  | 7.33×10 <sup>-5</sup> | 0    |
| rs139237114 | 9   | 110249816 | 9q31.2   | G/A                  | 0.004 | KLF4         | p.His287Tyr    | Secondary | -0.08              | 0.02  | 2.62×10 <sup>-5</sup>  | -0.11 | 0.022                     | 5.60×10 <sup>-7</sup>  | 0.1   | 0.015 | 9.79×10 <sup>-11</sup>  | 8.12×10 <sup>-5</sup> | 0    |
| Less common |     |           |          |                      |       |              |                |           |                    |       |                        |       |                           |                        |       |       |                         |                       |      |
| rs150270324 | 4   | 73178175  | 4q13.3   | T/C                  | 0.013 | ADAMTS3      | p.Asn585Ser    | Secondary | -0.07              | 0.012 | 1.31×10 <sup>-9</sup>  | -0.06 | 0.013                     | 2.97×10 <sup>-6</sup>  | -0.07 | 0.009 | 2.36×10 <sup>-14</sup>  | 1.12×10 <sup>-4</sup> | 0    |
| rs139921635 | 4   | 73181637  | 4q13.3   | G/T                  | 0.024 | ADAMTS3      | p.Pro513Thr    | Secondary | -0.06              | 0.009 | 5.58×10 <sup>-11</sup> | -0.04 | 0.01                      | 7.86×10 <sup>-6</sup>  | 0.05  | 0.007 | 4.06×10 <sup>-15</sup>  | 1.18×10 <sup>-4</sup> | 20.9 |
| rs11722554  | 4   | 5016883   | 4p16.2   | G/A                  | 0.038 | CYTL1        | p.Arg136Cys    | Primary   | -0.05              | 0.007 | 1.60×10 <sup>-10</sup> | -0.04 | 0.008                     | 1.20×10 <sup>-8</sup>  | 0.04  | 0.005 | 5.02×10 <sup>-18</sup>  | 1.44×10 <sup>-4</sup> | 0    |
| rs62621812  | 7   | 127015083 | 7q31.33  | G/A                  | 0.02  | ZNF800       | p.Pro103Ser    | Primary   | -0.1               | 0.01  | 6.90×10 <sup>-26</sup> | -0.07 | 0.011                     | 4.20×10 <sup>-10</sup> | 0.09  | 0.007 | 2.74×10 <sup>-34</sup>  | 2.94×10 <sup>-4</sup> | 80.3 |
| rs117874826 | 11  | 64027666  | 11q13.1  | A/C                  | 0.015 | PLCB3        | p.Glu564Ala    | Primary   | 0.07               | 0.013 | 1.40×10 <sup>-7</sup>  | 0.06  | 0.014                     | 1.60×10 <sup>-5</sup>  | 0.06  | 0.009 | 2.23×10 <sup>-11</sup>  | 1.10×10 <sup>-4</sup> | 0    |
| rs61688134  | 12  | 22017410  | 12p12.1  | C/T                  | 0.014 | ABC9         | p.Val734Ile    | Primary   | 0.06               | 0.011 | 3.90×10 <sup>-7</sup>  | 0.05  | 0.013                     | 1.50×10 <sup>-6</sup>  | -0.06 | 0.009 | 6.91×10 <sup>-14</sup>  | 8.65×10 <sup>-5</sup> | 0    |
| rs78457529  | 16  | 24950880  | 16p12.1  | C/T                  | 0.012 | ARHGAP17     | p.Arg510Gln    | Secondary | 0.12               | 0.012 | 1.08×10 <sup>-20</sup> | 0.08  | 0.014                     | 1.16×10 <sup>-9</sup>  | -0.1  | 0.009 | 4.37×10 <sup>-28</sup>  | 2.34×10 <sup>-4</sup> | 69.8 |
| rs60782127  | 16  | 16142079  | 16p13.11 | G/T                  | 0.014 | ABCC1        | p.Arg433Ser    | Primary   | -0.07              | 0.011 | 1.60×10 <sup>-7</sup>  | -0.06 | 0.013                     | 2.60×10 <sup>-5</sup>  | 0.06  | 0.009 | 2.91×10 <sup>-11</sup>  | 1.02×10 <sup>-4</sup> | 0    |
| rs34934920  | 19  | 38976655  | 19q13.2  | C/T                  | 0.025 | RYR1         | p.Pro1787Leu   | Primary   | 0.05               | 0.009 | 1.10×10 <sup>-7</sup>  | 0.04  | 0.009                     | 1.90×10 <sup>-7</sup>  | -0.04 | 0.006 | 1.72×10 <sup>-11</sup>  | 8.89×10 <sup>-5</sup> | 0    |
| rs62621197  | 19  | 8670147   | 19p13.2  | C/T                  | 0.037 | ADAMTS10     | p.Arg62Gln     | Primary   | -0.07              | 0.007 | 1.20×10 <sup>-21</sup> | -0.06 | 0.008                     | 2.10×10 <sup>-15</sup> | 0.07  | 0.005 | 5.60×10 <sup>-36</sup>  | 3.27×10 <sup>-4</sup> | 0    |
| rs78648341  | 20  | 19915770  | 20p11.23 | G/A                  | 0.015 | RIN2         | p.Gly29Arg     | Primary   | -0.07              | 0.011 | 3.10×10 <sup>-7</sup>  | -0.05 | 0.013                     | 1.20×10 <sup>-5</sup>  | 0.06  | 0.008 | 4.05×10 <sup>-14</sup>  | 1.10×10 <sup>-4</sup> | 0    |
| Common      |     |           |          |                      |       |              |                |           |                    |       |                        |       |                           |                        |       |       |                         |                       |      |
| rs3850625   | 1   | 201016296 | 1q32.1   | G/A                  | 0.118 | CACNA1S      | p.Arg1539Cys   | Primary   | 0.03               | 0.004 | 1.20×10 <sup>-9</sup>  | 0.02  | 0.004                     | 6.40×10 <sup>-6</sup>  | -0.02 | 0.003 | 1.26×10 <sup>-14</sup>  | 1.13×10 <sup>-4</sup> | 7.3  |
| rs1047891   | 2   | 211540507 | 2q34     | C/A                  | 0.316 | CPST1        | p.Thr1412Asn   | Primary   | -0.03              | 0.003 | 6.70×10 <sup>-26</sup> | -0.02 | 0.003                     | 1.40×10 <sup>-6</sup>  | 0.02  | 0.002 | 8.41×10 <sup>-26</sup>  | 2.35×10 <sup>-4</sup> | 92   |
| rs1260326   | 2   | 27730940  | 2p23.3   | C/T                  | 0.396 | GCKR         | p.Leu446Pro    | Primary   | -0.02              | 0.003 | 1.60×10 <sup>-19</sup> | -0.02 | 0.003                     | 2.20×10 <sup>-15</sup> | -0.02 | 0.002 | 7.83×10 <sup>-33</sup>  | 2.71×10 <sup>-4</sup> | 0    |
| rs11545169  | 3   | 184020542 | 3q27.1   | G/T                  | 0.161 | PSMD2        | p.Glu313Asp    | Primary   | 0.03               | 0.004 | 7.00×10 <sup>-14</sup> | 0.03  | 0.004                     | 1.60×10 <sup>-15</sup> | -0.03 | 0.003 | 2.56×10 <sup>-27</sup>  | 2.24×10 <sup>-4</sup> | 0    |
| rs123509    | 3   | 42733468  | 3p22.1   | C/T                  | 0.248 | KLHL40       | p.Cys617Arg    | Primary   | 0.02               | 0.003 | 1.20×10 <sup>-9</sup>  | 0.02  | 0.003                     | 9.90×10 <sup>-9</sup>  | 0.02  | 0.002 | 1.07×10 <sup>-15</sup>  | 1.23×10 <sup>-4</sup> | 0    |
| rs34811474  | 4   | 25408838  | 4p15.2   | G/A                  | 0.231 | ANAPC4       | p.Arg465Gln    | Primary   | -0.02              | 0.003 | 1.10×10 <sup>-7</sup>  | 0.02  | 0.003                     | 1.20×10 <sup>-7</sup>  | -0.02 | 0.002 | 1.13×10 <sup>-15</sup>  | 1.23×10 <sup>-4</sup> | 0    |
| rs1291602   | 5   | 130766662 | 5q31.1   | C/T                  | 0.159 | CTC-432M15.3 | p.Gln1452Arg   | Primary   | -0.02              | 0.004 | 3.80×10 <sup>-7</sup>  | -0.02 | 0.004                     | 2.90×10 <sup>-7</sup>  | -0.02 | 0.003 | 2.21×10 <sup>-11</sup>  | 1.03×10 <sup>-4</sup> | 0    |
| rs351855    | 5   | 176520243 | 5q35.2   | G/A                  | 0.297 | FGFR4        | p.Gly388Arg    | Primary   | -0.04              | 0.003 | 4.90×10 <sup>-15</sup> | -0.03 | 0.003                     | 2.80×10 <sup>-15</sup> | 0.03  | 0.002 | 3.16×10 <sup>-55</sup>  | 4.68×10 <sup>-4</sup> | 0    |
| rs35523808  | 6   | 75834971  | 6q13     | A/T                  | 0.951 | COL12A1      | p.Glu2160Val   | Primary   | 0.05               | 0.006 | 1.60×10 <sup>-13</sup> | 0.05  | 0.007                     | 7.40×10 <sup>-12</sup> | -0.05 | 0.005 | 9.93×10 <sup>-24</sup>  | 2.05×10 <sup>-4</sup> | 0    |
| rs10283100  | 8   | 120596023 | 8q24.12  | G/A                  | 0.056 | ENPP2        | p.Ser493Pro    | Primary   | -0.04              | 0.006 | 2.70×10 <sup>-11</sup> | -0.04 | 0.006                     | 9.50×10 <sup>-10</sup> | -0.04 | 0.004 | 1.20×10 <sup>-18</sup>  | 1.50×10 <sup>-4</sup> | 0    |
| rs41307479  | 9   | 116082647 | 9q32     | C/G                  | 0.221 | WDR31        | p.Cys256Ser    | Primary   | 0.01               | 0.003 | 2.00×10 <sup>-5</sup>  | 0.02  | 0.004                     | 3.70×10 <sup>-6</sup>  | 0.01  | 0.002 | 1.30×10 <sup>-9</sup>   | 7.04×10 <sup>-5</sup> | 0    |
| rs10761129  | 9   | 94486321  | 9q22.31  | T/C                  | 0.331 | ROR2         | p.Val819Ile    | Primary   | -0.01              | 0.003 | 3.70×10 <sup>-7</sup>  | -0.02 | 0.003                     | 9.60×10 <sup>-10</sup> | 0.02  | 0.002 | 8.87×10 <sup>-15</sup>  | 1.16×10 <sup>-4</sup> | 16.2 |
| rs2277339   | 12  | 57146069  | 12q13.3  | T/G                  | 0.104 | PRIM1        | p.Asp5Ala      | Primary   | 0.02               | 0.004 | 8.70×10 <sup>-7</sup>  | 0.02  | 0.005                     | 1.90×10 <sup>-6</sup>  | 0.02  | 0.003 | 1.88×10 <sup>-11</sup>  | 8.85×10 <sup>-5</sup> | 0    |
| rs12889267  | 14  | 21542766  | 14q11.2  | A/G                  | 0.167 | ARHGEF40     | p.Lys293Glu    | Primary   | 0.02               | 0.004 | 6.50×10 <sup>-6</sup>  | 0.03  | 0.004                     | 4.50×10 <sup>-11</sup> | 0.02  | 0.003 | 5.08×10 <sup>-14</sup>  | 1.09×10 <sup>-4</sup> | 70.2 |
| rs117068593 | 14  | 93118229  | 14q32.13 | C/T                  | 0.19  | RIN3         | p.Arg204Cys    | Primary   | -0.04              | 0.003 | 8.30×10 <sup>-14</sup> | -0.05 | 0.004                     | 6.90×10 <sup>-9</sup>  | 0.04  | 0.003 | 4.40×10 <sup>-71</sup>  | 6.19×10 <sup>-4</sup> | 50.9 |
| rs35874463  | 15  | 67457698  | 15q22.33 | A/G                  | 0.058 | SMAD3        | p.Ile170Val    | Secondary | 0.02               | 0.006 | 2.64×10 <sup>-5</sup>  | 0.03  | 0.006                     | 5.73×10 <sup>-6</sup>  | 0.03  | 0.004 | 7.11×10 <sup>-10</sup>  | 7.29×10 <sup>-5</sup> | 0    |
| rs72755233  | 15  | 100692953 | 15q26.3  | G/A                  | 0.112 | ADAMTS17     | p.Thr446Ile    | Primary   | -0.07              | 0.004 | 4.70×10 <sup>-10</sup> | -0.06 | 0.005                     | 7.40×10 <sup>-8</sup>  | 0.06  | 0.003 | 6.16×10 <sup>-95</sup>  | 7.86×10 <sup>-4</sup> | 0    |
| rs3817428   | 15  | 89415247  | 15q26.1  | G/C                  | 0.265 | ACAN         | p.Asp2373Glu   | Primary   | -0.05              | 0.003 | 1.20×10 <sup>-10</sup> | -0.05 | 0.003                     | 9.70×10 <sup>-8</sup>  | -0.05 | 0.002 | 2.04×10 <sup>-104</sup> | 9.06×10 <sup>-4</sup> | 27   |
| rs36000545  | 17  | 79093822  | 17q25.3  | A/G                  | 0.396 | AATK         | p.Phe1266Ser   | Primary   | 0.01               | 0.003 | 5.10×10 <sup>-6</sup>  | 0.01  | 0.003                     | 2.40×10 <sup>-5</sup>  | 0.01  | 0.002 | 2.13×10 <sup>-10</sup>  | 7.96×10 <sup>-5</sup> | 0    |
| rs61734651  | 20  | 61451332  | 20q13.33 | C/T                  | 0.071 | COL9A3       | p.Arg103Tyr    | Primary   | 0.03               | 0.005 | 1.30×10 <sup>-10</sup> | 0.06  | 0.006                     | 1.10×10 <sup>-21</sup> | -0.04 | 0.004 | 1.20×10 <sup>-28</sup>  | 2.61×10 <sup>-4</sup> | 87.1 |
| rs1291212   | 20  | 62340115  | 20q13.33 | G/C                  | 0.081 | ZGPAT        | p.Ser61Arg     | Primary   | 0.04               | 0.005 | 2.50×10 <sup>-17</sup> | 0.03  | 0.005                     | 6.30×10 <sup>-10</sup> | 0.04  | 0.004 | 7.46×10 <sup>-26</sup>  | 2.06×10 <sup>-4</sup> | 49.7 |
| rs17265513  | 20  | 39832628  | 20q12    | T/C                  | 0.199 | ZHX3         | p.Asn310Ser    | Primary   | 0.03               | 0.003 | 1.20×10 <sup>-17</sup> | 0.02  | 0.004                     | 4.90×10 <sup>-12</sup> | 0.03  | 0.003 | 5.56×10 <sup>-26</sup>  | 2.32×10 <sup>-4</sup> | 0    |
| rs2830585   | 21  | 28305212  | 21q21.3  | C/T                  | 0.16  | ADAMTS5      | p.Arg614His    | Primary   | -0.02              | 0.004 | 2.60×10 <sup>-8</sup>  | -0.03 | 0.004                     | 3.40×10 <sup>-11</sup> | 0.02  | 0.003 | 2.80×10 <sup>-19</sup>  | 1.56×10 <sup>-4</sup> | 54.1 |

771 **Notes:** Abbreviations: rsID, based on dbSNP; CHR, chromosome; POS, base positions; BAND, chromosome band; REF, reference allele; ALT, alternative allele; FRQ, frequency of alternative allele; B,

772 beta coefficient of linear mixed model; SE, standard error of beta; P, P-value; H2, proportion of variance explained by this SNP; I2, I2 statistics of SNP in meta-analysis. Under condition column,

773 Primary means it is an independent lead SNP identified before conditioning analysis and Secondary means it is a SNP identified in conditional analysis. Genomic coordinate was based on human

774 genome assembly build 37 (GRCh 37).

**A**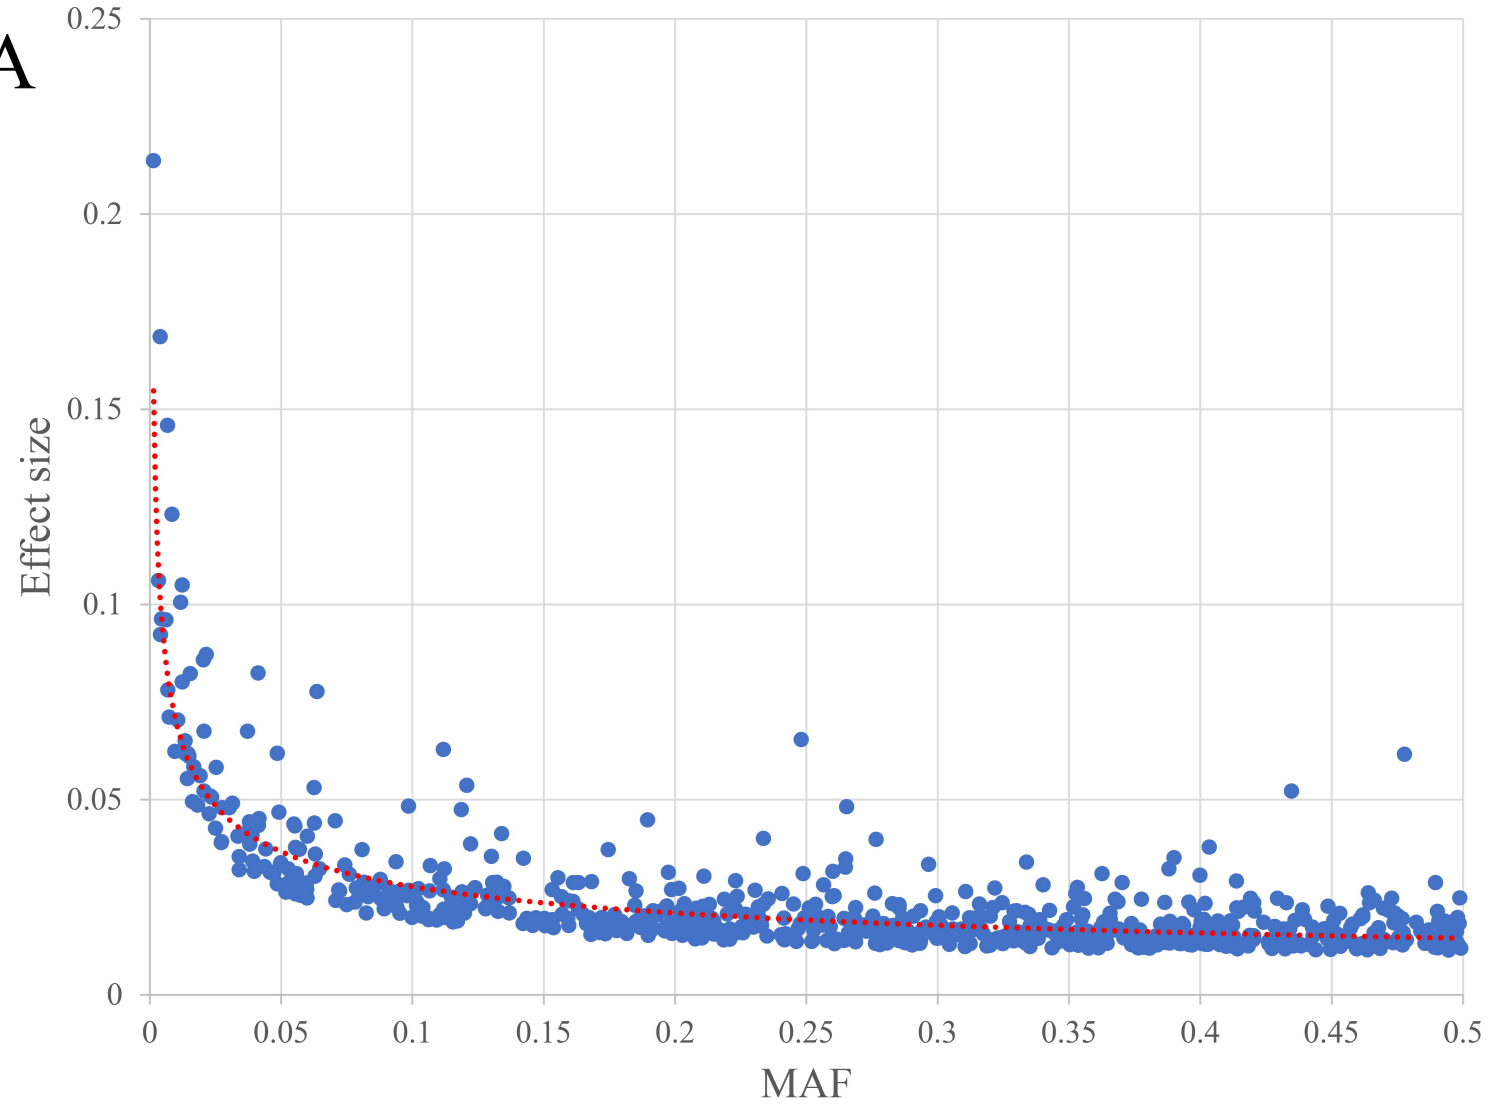**B**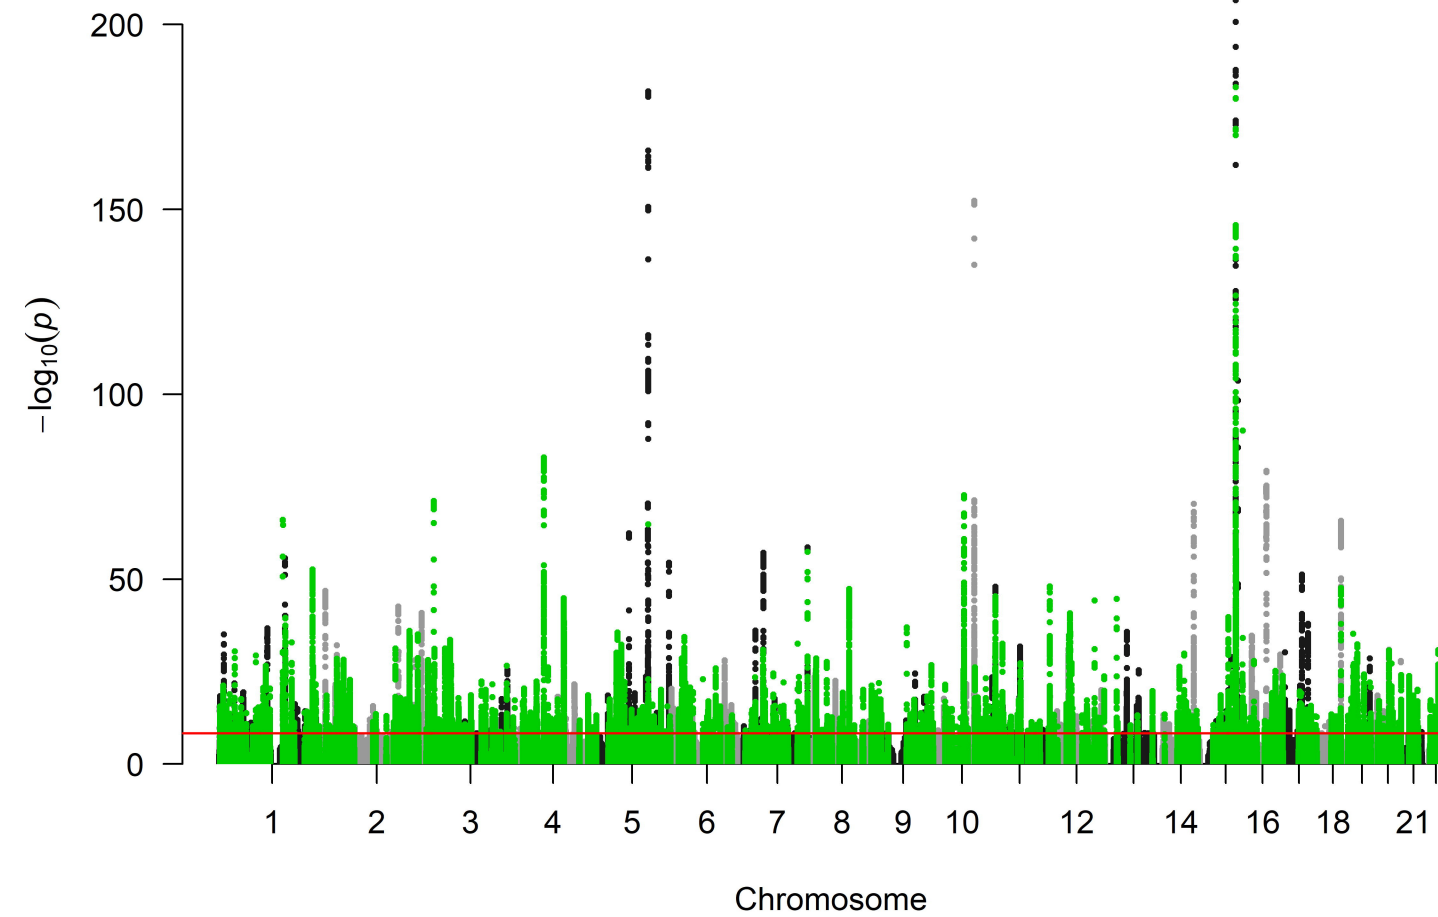

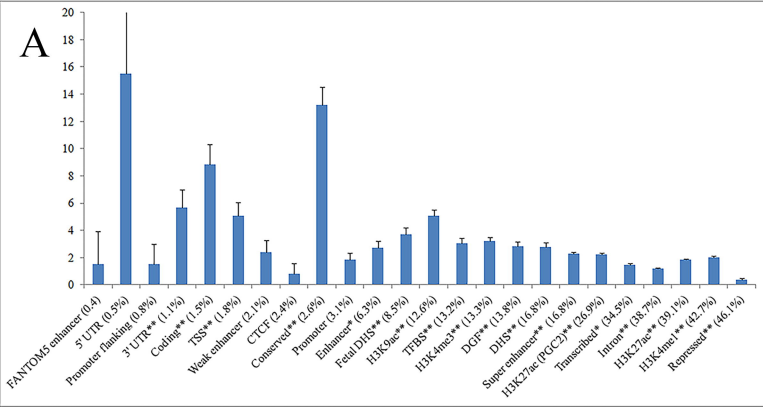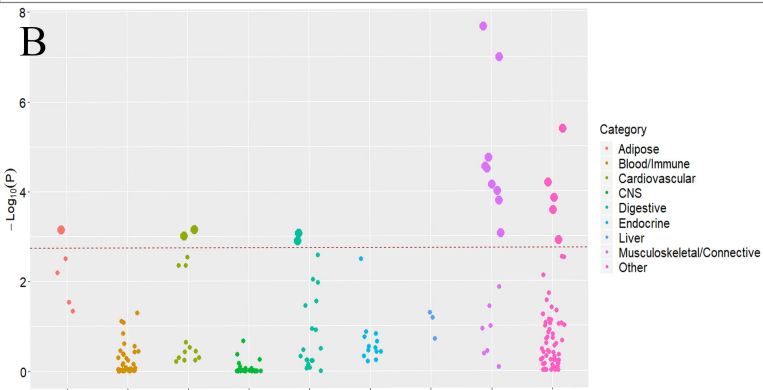

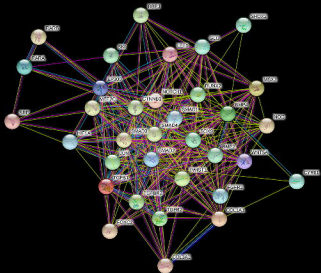

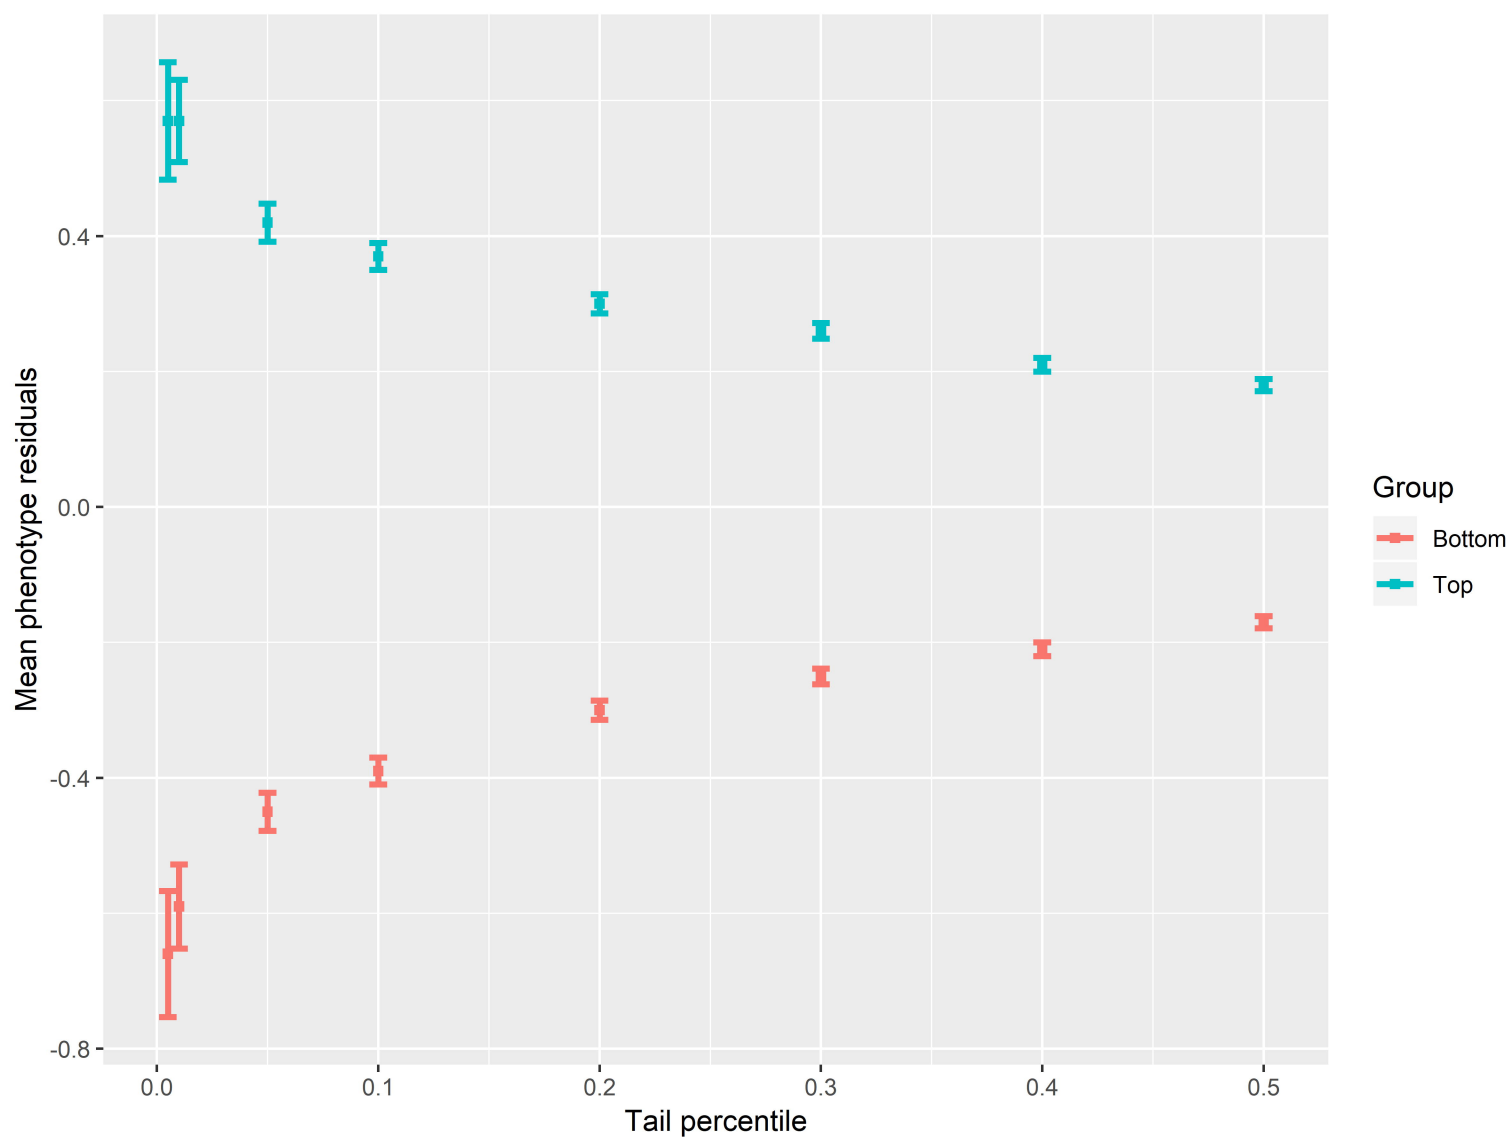



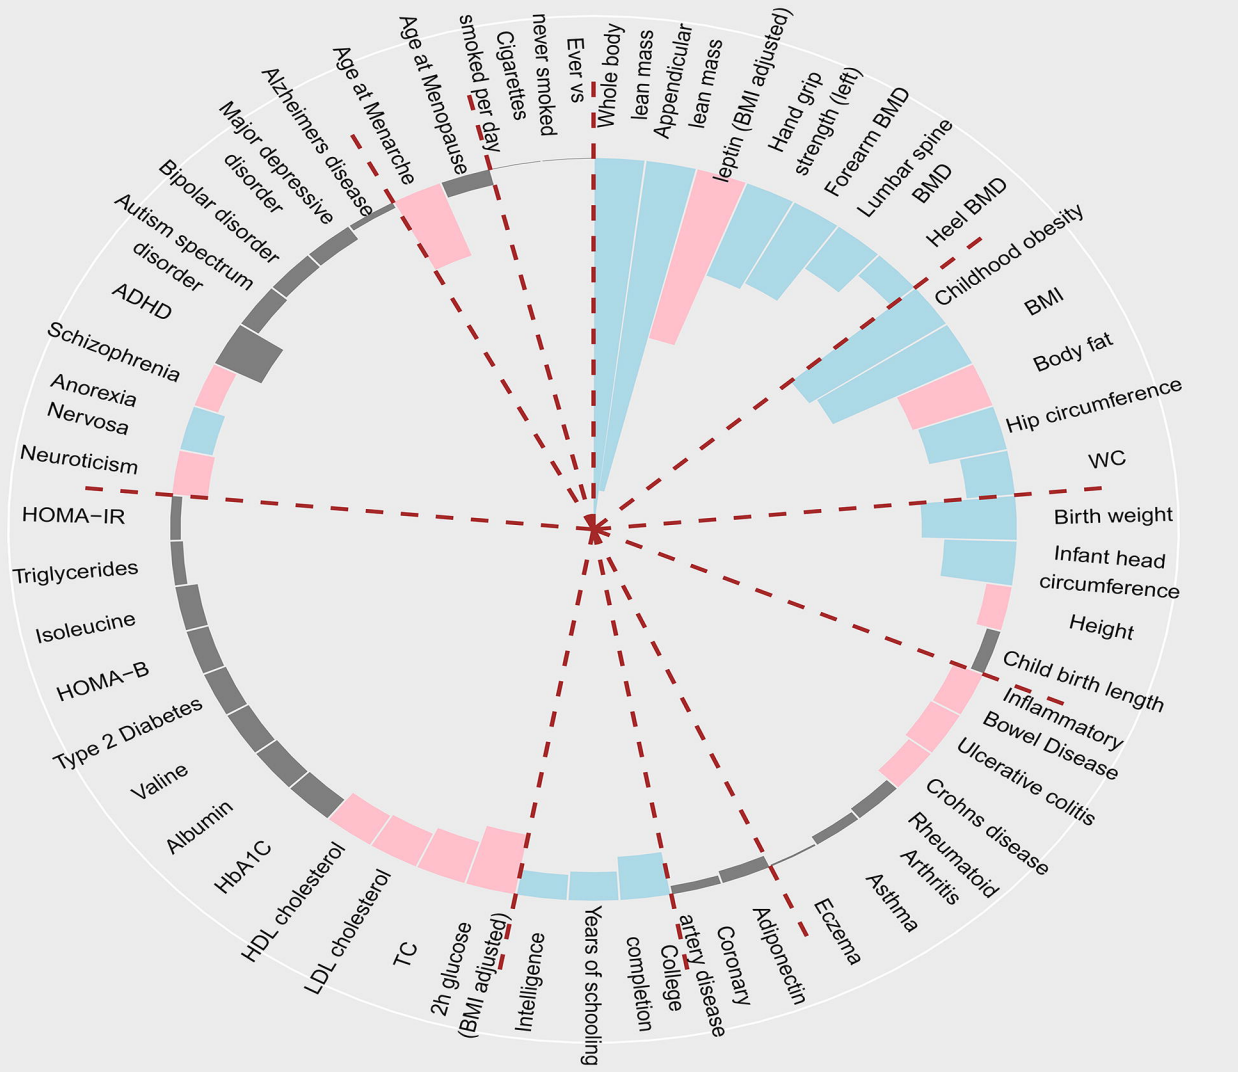

**Direction**

- Not significant
- Positive
- Negative
